# Supplementary material for: Genome-Wide Association Study Reveals Candidate Genes for Root-Related Traits in Rice
Source: MDPI journal article supplement (doi:10.3390/cimb44100301), 2022-09-21
Supplement: s1 [file s1]

# Genome-wide association study Reveals Candidate Genes for root-related traits in Rice

**Figure S1.** Distribution of single nucleotide polymorphisms (SNPs) and nucleotide diversity across the rice Nipponbare genome in the rice association panel.

**Figure S2.** LD decay distance estimated for 391 rice accessions.

**Figure S3.** Histograms showing the data distribution of three traits of 391 rice accessions.

**Figure S4.** The genome-wide association plots of MRL, ARL and TRN in *xian* rice population were plotted using general linear model and mixed model methods.

**Figure S5.** The genome-wide association plots of MRL, ARL and TRN in *geng* rice population were plotted using general linear model and mixed model methods.

**Figure S6.** Venn diagram of the proportion of QTL controls for single and multiple traits.

**Figure S7.** Haplotype analysis of LOC\_Os03g22830.

**Figure S8.** Haplotype analysis of LOC\_Os03g49380.

**Figure S9.** Haplotype analysis of LOC\_Os07g15540.

## Supplementary Figure

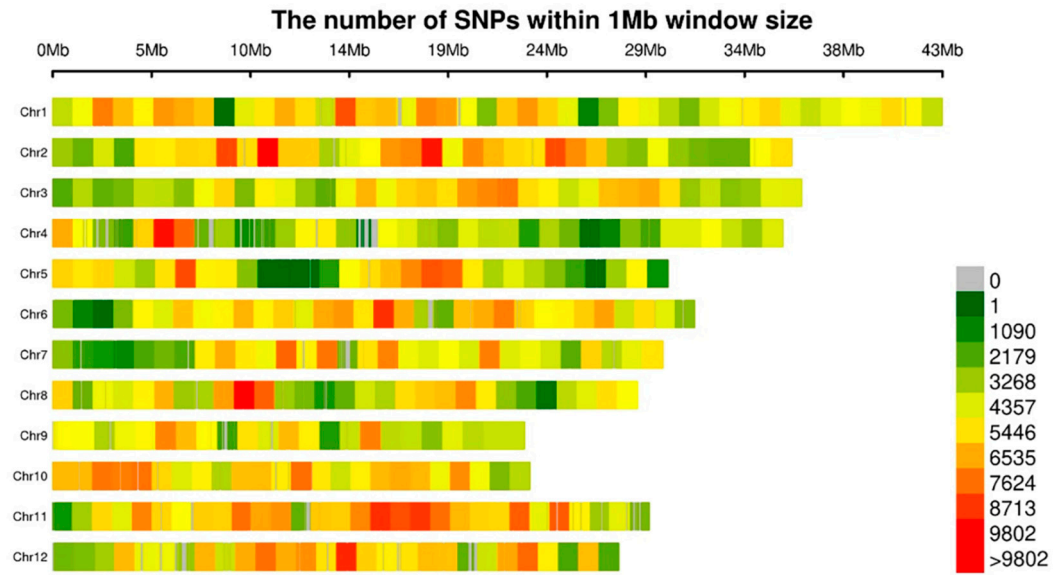

**Figure S1.** Distribution of single nucleotide polymorphisms (SNPs) and nucleotide diversity across the rice Nipponbare genome in the rice association panel.

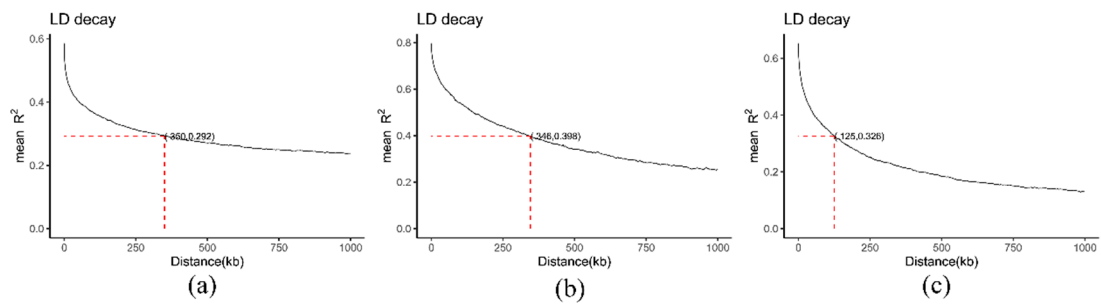

**Figure S2.** LD decay distance estimated for 391 rice accessions. (a) whole population; (b) *geng* rice accessions; (c) *xian* rice accessions.

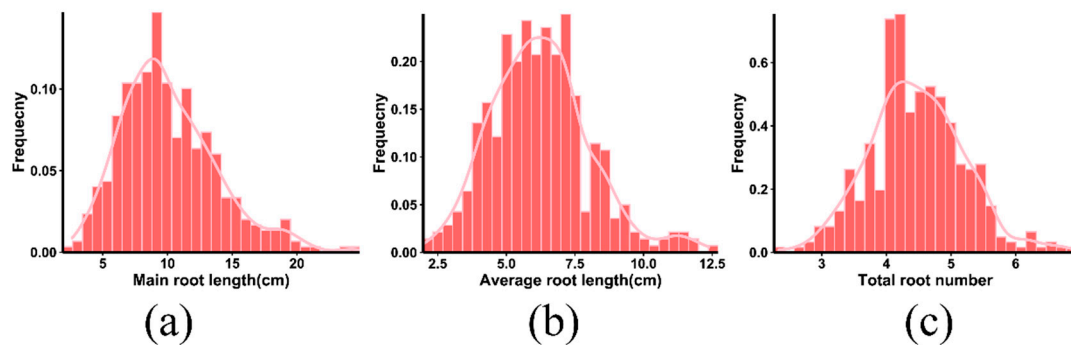

**Figure S3.** Histograms showing the data distribution of three traits of 391 rice accessions. (a) MRL; (b) ARL; (c) TRN.

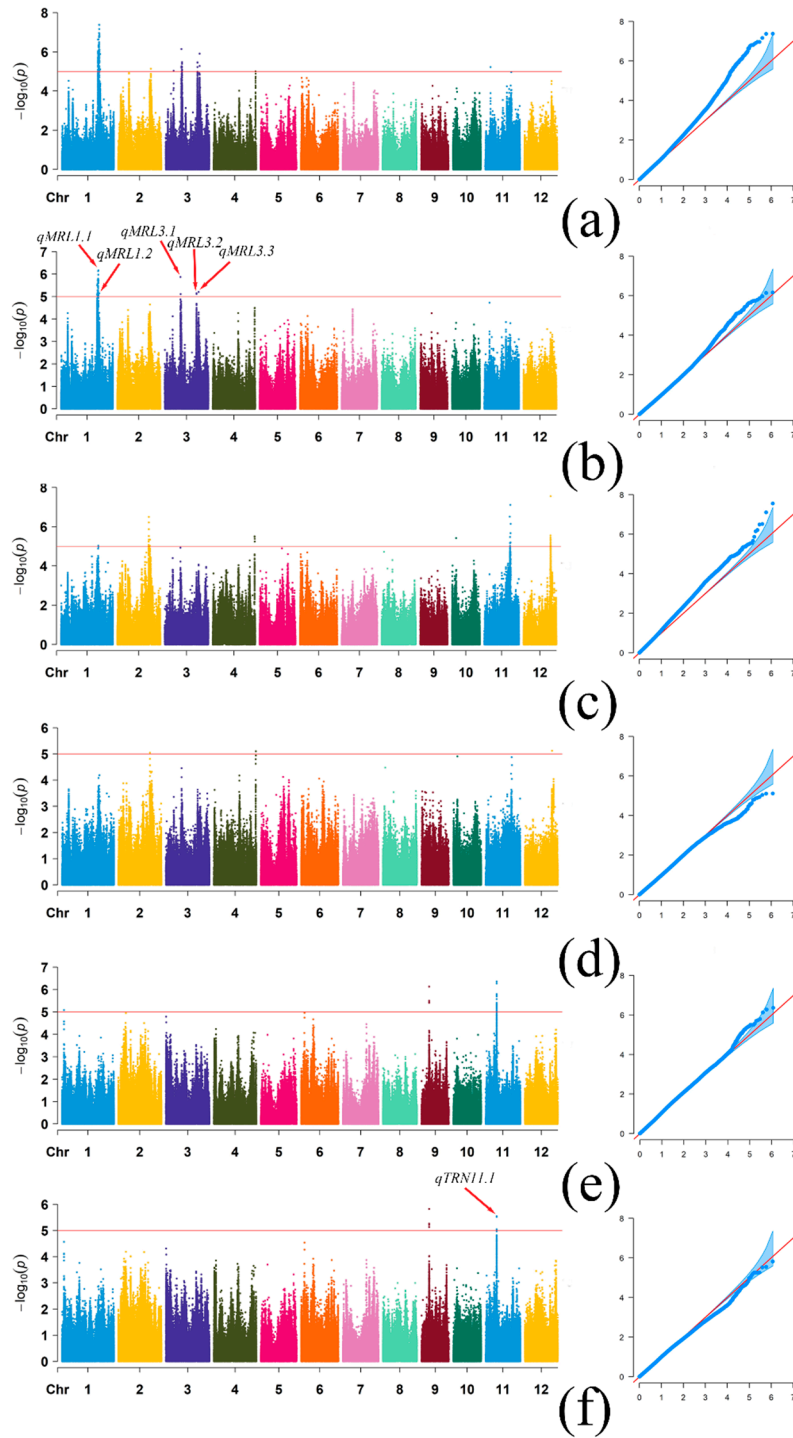

**Figure S4.** The genome-wide association plots of MRL, ARL and TRN in *xian* rice population were plotted using general linear model and mixed model methods. The Manhattan map of genome-wide scans showed  $-\log_{10}(P)$  values corresponding to the location of each chromosome on 12 chromosomes. Red solid lines represent the whole genome significant threshold  $P = 5.0 \times 10^{-5}$ . The horizontal axis in the quantile-quantile (QQ) plot represents the expected value of the  $-\log_{10}$  transform, while the vertical axis represents the observed value of the  $-\log_{10}$  transform. Manhattan plot and QQ plot of MRL (a) in GLM (b) and MLM; Manhattan plot and QQ plot of ARL in GLM (c) and MLM (d); Manhattan plot and QQ plot of TRN in GLM (e) and MLM (f).

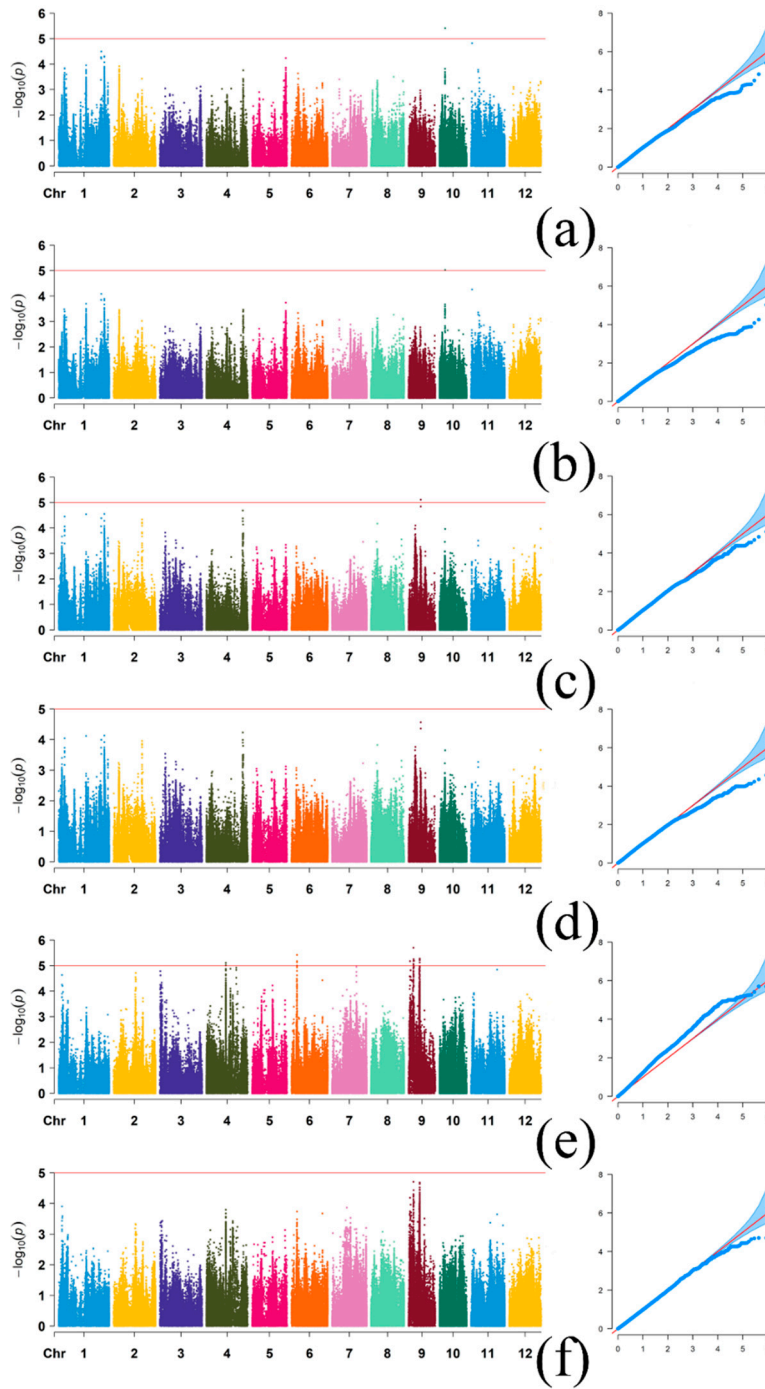

**Figure S5.** The genome-wide association plots of MRL, ARL and TRN in *geng* rice population were plotted using general linear model and mixed model methods. The Manhattan map of genome-wide scans showed  $-\log_{10}(P)$  values corresponding to the location of each chromosome on 12 chromosomes. Red solid lines represent the whole genome's significant threshold  $P = 5.0 \times 10^{-5}$ . The horizontal axis in the quantile-quantile (QQ) plot represents the expected value of the  $-\log_{10}$  transform, while the vertical axis represents the observed value of the  $-\log_{10}$  transform. Manhattan plot and QQ plot of MRL (a) in GLM (b) and MLM; Manhattan plot and QQ plot of ARL in GLM (c) and MLM (d); Manhattan plot and QQ plot of TRN in GLM (e) and MLM (f).

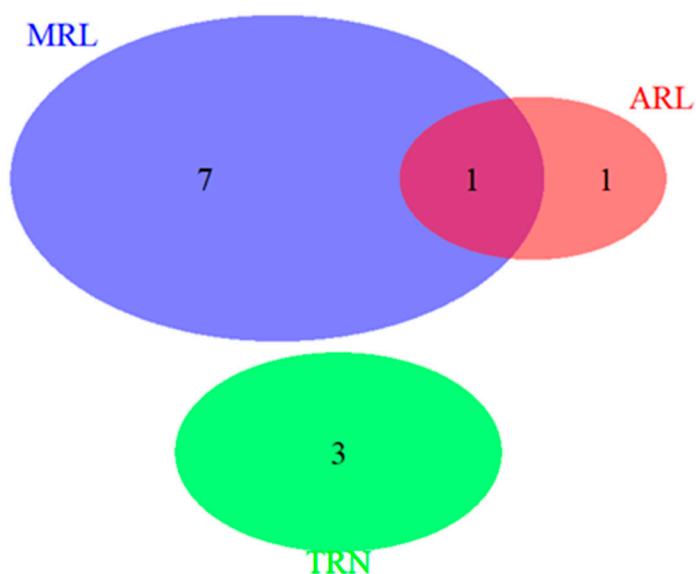

**Figure S6.** Venn diagram of the proportion of QTL controls for single and multiple traits.

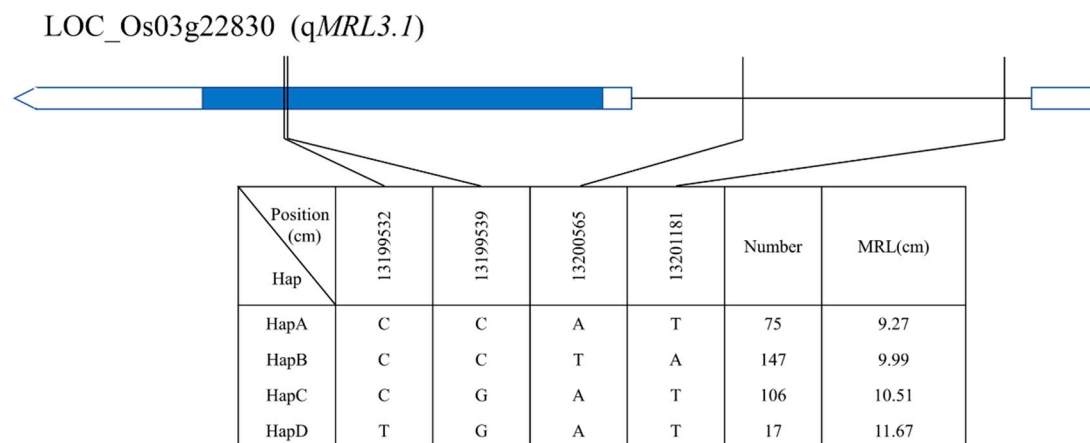

(a)

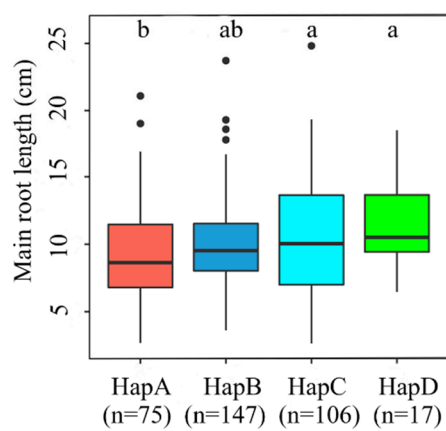

(b)

**Figure S7.** Haplotype analysis of LOC\_Os03g22830. (a) Based on four SNPs observed in all evaluated rice

accessions, four haplotypes of LOC\_Os03g22830 were identified. In the gene structure diagram of LOC\_Os03g22830, the promoter is indicated by white frame; the exon is represented by blue frame; and the intron and intergenic regions are marked by black lines. A thin black line represents the genomic location of each SNP. Haplotypes with fewer than 10 accessions are not shown. (b) Based on MRL of LOC\_Os03g22830 haplotype, differences between the haplotypes were statistically analyzed using Tukey's test.

LOC\_Os03g49380 (qMRL3.3)

| Position<br>(bp) | 28106907 | 28107105 | 28107212 | 28108390 | 28108491 | 28108646 | 28108964 | 28109489 | 28109540 | 28109736 | 28109769 | 28109888 | 28110040 | 28110837 | 28111227 | 28111886 | 28111909 | 28112240 | 28113053 | 28113079 | Number | MRL(cm) |
|------------------|----------|----------|----------|----------|----------|----------|----------|----------|----------|----------|----------|----------|----------|----------|----------|----------|----------|----------|----------|----------|--------|---------|
| Hap              |          |          |          |          |          |          |          |          |          |          |          |          |          |          |          |          |          |          |          |          |        |         |
| HapA             | C        | C        | A        | A        | T        | C        | G        | C        | G        | A        | T        | T        | C        | C        | C        | G        | G        | T        | A        |          | 33     | 11.43   |
| HapB             | C        | C        | T        | C        | G        | C        | G        | T        | A        | T        | C        | T        | C        | C        | T        | G        | C        | T        | G        |          | 19     | 13.71   |
| HapC             | C        | T        | T        | C        | A        | T        | C        | G        | T        | G        | T        | C        | T        | C        | C        | T        | G        | T        | G        |          | 63     | 9.18    |
| HapD             | G        | C        | T        | C        | A        | T        | A        | C        | T        | G        | T        | C        | G        | T        | T        | T        | G        | C        | G        |          | 125    | 9.76    |
| HapE             | G        | C        | T        | C        | A        | T        | C        | G        | T        | G        | T        | C        | T        | C        | C        | T        | G        | T        | G        |          | 87     | 9.57    |

(a)

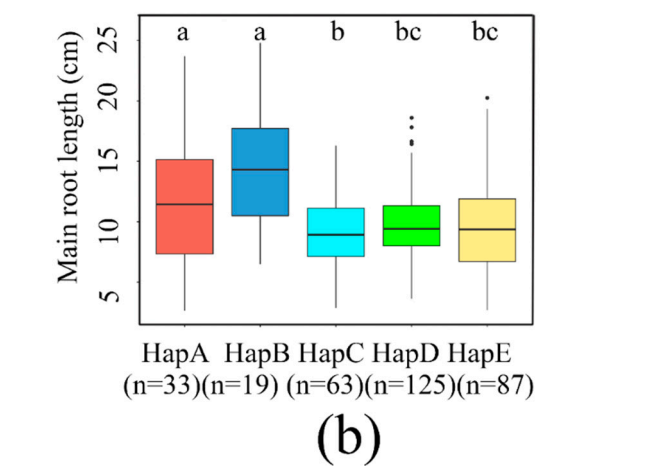

(b)

**Figure S8.** Haplotype analysis of LOC\_Os03g49380. (a) Based on 20 SNPs observed in all evaluated rice accessions, five haplotypes of LOC\_Os03g49380 were identified. In the gene structure diagram of LOC\_Os03g49380, the promoter is indicated by white frame; the exon is represented by blue frame; and the intron and intergenic regions are marked by black lines. A thin black line represents the genomic location of each SNP. Haplotypes with fewer than 10 accessions are not shown. (b) Based on MRL of LOC\_Os03g49380, differences between the haplotypes were statistically analyzed using Tukey's test.

# LOC\_Os07g15540 (qMRL7.1)

| Position<br>(cm) | 9005325 | 9005432 | 9005554 | 9005679 | 9005705 | 9005741 | 9006340 | 9006496 | 9006526 | 9006562 | 9006588 | 9006901 | 9006908 | 9006930 | 9006976 | 9007031 | 9007152 | 9007205 | 9007276 | 9007388 | 9007680 | 9007805 | Number | MRL(cm) |
|------------------|---------|---------|---------|---------|---------|---------|---------|---------|---------|---------|---------|---------|---------|---------|---------|---------|---------|---------|---------|---------|---------|---------|--------|---------|
| Hap              |         |         |         |         |         |         |         |         |         |         |         |         |         |         |         |         |         |         |         |         |         |         |        |         |
| HapA             | C       | A       | C       | G       | A       | C       | T       | C       | G       | C       | G       | T       | G       | T       | G       | C       | A       | G       | T       | A       | T       | G       | 111    | 9.13    |
| HapB             | G       | A       | C       | A       | T       | G       | C       | T       | G       | C       | A       | C       | C       | C       | G       | C       | G       | G       | C       | G       | C       | A       | 102    | 9.64    |
| HapC             | G       | A       | C       | A       | T       | G       | C       | T       | G       | C       | G       | C       | C       | T       | G       | C       | G       | G       | C       | G       | C       | A       | 52     | 10.91   |
| HapD             | G       | G       | A       | G       | T       | C       | C       | C       | A       | T       | G       | C       | C       | T       | C       | T       | G       | C       | T       | G       | T       | A       | 49     | 11.93   |

(a)

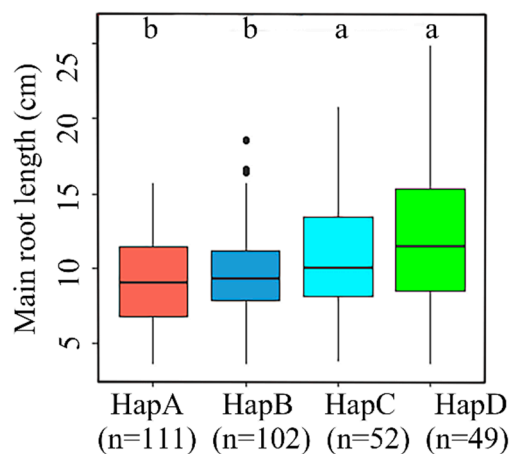

(b)

**Figure S9.** Haplotype analysis of LOC\_Os07g15540. (a) Based on 22 SNPs observed in all evaluated rice accessions, four haplotypes of LOC\_Os07g15540 were identified. In the gene structure diagram of LOC\_Os07g15540, the promoter is indicated by white frame; the exon is represented by blue frame; and the intron and intergenic regions are marked by black lines. A thin black line represents the genomic location of each SNP. Haplotypes with fewer than 10 accessions are not shown. (b) Based on MRL of LOC\_Os07g15540 haplotype, differences between the haplotypes were statistically analyzed using Tukey's test.
