# Supplementary material for: Genome-Wide Association Study Reveals Candidate Genes for Root-Related Traits in Rice
Source: Curr Issues Mol Biol. 2022 Sep 21;44(10):4386–405. doi: 10.3390/cimb44100301 (PMC9601093; doi:10.3390/cimb44100301)
Supplement: Supplementary file 1 [file cimb-44-00301-s001.zip › Supplementary Table.xlsx]

## Sheet: Table S1
Table S1.Information of 391 rice accessions
Sequencing number	subpopulation	country
313-10030	Xian	Madagascar
313-10238	Xian	Philippines
313-10285	Xian	Peru
313-10403	Xian	Colombia
313-10404	Xian	India
313-10412	Xian	Indonesia
313-15897	Xian	China
313-15910	Geng	USA
313-7641	Xian	Indonesia
313-7664	Xian	Colombia
313-7665	Xian	Colombia
313-7668	Xian	Indonesia
313-7685	Xian	Philippines
313-7688	Xian	Philippines
313-7690	Xian	Philippines
313-7691	Xian	Philippines
313-7698	Xian	Philippines
313-7699	Xian	Philippines
313-7719	Xian	Mali
313-7728	Xian	Madagascar
313-7838	Geng	Senegal
313-7856	Geng	Thailand
313-7863	Geng	Brazil
313-7866	Geng	Colombia
313-7868	Geng	Colombia
313-7870	Geng	Brazil
313-7883	Geng	Indonesia
313-7902	Geng	Philippines
313-7907	Geng	Philippines
313-7909	Geng	Philippines
313-7922	Geng	French Guiana
313-7959	Geng	Madagascar
313-8003	Geng	Philippines
313-8010	Geng	Philippines
313-8025	Geng	Italy
313-8027	Geng	Italy
313-8029	Geng	Italy
313-8033	Geng	Italy
313-8044	Geng	Italy
313-8060	Geng	Argentina
313-8061	Geng	Argentina
313-8064	Geng	Argentina
313-8069	Xian	Romania
313-8072	Geng	USA
313-8073	AUS	USA
313-8074	Geng	Australia
313-8075	Geng	Australia
313-8076	Geng	Australia
313-8102	Geng	USA
313-8111	Geng	Portugal
313-8115	Geng	Portugal
313-8116	Geng	Portugal
313-8118	Geng	Portugal
313-8121	Geng	Italy
313-8134	Geng	Portugal
313-8135	Geng	Bulgaria
313-8136	Geng	Portugal
313-8137	Geng	Portugal
313-8159	Geng	Colombia
313-8160	Geng	Colombia
313-8161	Xian	Brazil
313-8166	Geng	France
313-8168	Geng	France
313-8170	Geng	France
313-8171	Geng	Hungary
313-8173	Geng	USA
313-8177	Geng	Italy
313-8180	Geng	USA
313-8185	Geng	Italy
313-8186	Geng	USA
313-8192	Geng	USA
313-8193	Geng	USA
313-8212	Xian	Egypt
313-8215	Xian	France
313-8390	AUS	Pakistan
313-8398	AUS	Pakistan
313-8410	AUS	Bangladesh
313-8523	Geng	Nigeria
313-8554	AUS	India
313-8641	AUS	Bangladesh
313-8655	AUS	Pakistan
313-8721	AUS	Bangladesh
313-8771	AUS	India
313-8789	AUS	Bangladesh
313-8864	AUS	Bangladesh
313-8903	Xian	Philippines
313-8955	Geng	Malaysia
313-8963	AUS	Bangladesh
313-9002	Geng	Japan
313-9137	AUS	India
313-9283	AUS	Pakistan
313-9368	AUS	Bangladesh
313-9422	AUS	Bangladesh
313-9449	AUS	Pakistan
313-9558	Geng	Malaysia
313-9610	AUS	India
313-9661	AUS	Bangladesh
313-9724	Geng	China
313-9880	Geng	Hungary
CX1	Geng	_no_info
CX101	Xian	China
CX102	Xian	Taian
CX103	Admix	Peru
CX106	Geng	Viet Nam
CX109	Geng	India
CX11	Geng	China
CX111	Geng	Egypt
CX112	Geng	Japan
CX113	Geng	_no_info
CX114	Xian	China
CX115	Xian	China
CX116	Geng	North Korea
CX117	Xian	Philippines
CX118	Xian	China
CX119	Xian	_no_info
CX123	Xian	China
CX124	Xian	Philippines
CX126	Xian	Philippines
CX128	Xian	Nepal
CX131	Xian	Myanmar
CX132	Geng	India
CX133	Xian	China
CX134	Xian	Philippines
CX139	Geng	Portugal
CX142	Geng	China
CX145	Xian	China
CX151	Geng	Philippines
CX162	Xian	Taian
CX163	Geng	_no_info
CX167	Xian	_no_info
CX168	Xian	_no_info
CX170	Xian	_no_info
CX172	Geng	_no_info
CX174	Geng	_no_info
CX175	Geng	_no_info
CX176	Xian	_no_info
CX177	Xian	_no_info
CX178	Xian	_no_info
CX179	Geng	_no_info
CX182	Xian	Japan
CX183	Xian	_no_info
CX184	Xian	_no_info
CX185	Xian	_no_info
CX189	Xian	_no_info
CX19	Xian	China
CX190	Xian	_no_info
CX191	Xian	_no_info
CX193	Xian	_no_info
CX194	Xian	_no_info
CX196	Xian	_no_info
CX197	Xian	_no_info
CX198	Xian	_no_info
CX199	Xian	_no_info
CX2	Xian	Bangladesh
CX200	Xian	_no_info
CX201	Geng	_no_info
CX202	Xian	_no_info
CX203	Xian	_no_info
CX207	Xian	China
CX210	Admix	China
CX211	Geng	China
CX213	Geng	China
CX214	Geng	Brazil
CX215	Xian	_no_info
CX216	Xian	_no_info
CX219	Xian	Philippines
CX220	Geng	Cote d'Ivoire
CX221	Xian	China
CX223	Geng	_no_info
CX224	Geng	_no_info
CX225	Xian	Philippines
CX226	Xian	Philippines
CX227	AUS	India
CX228	Xian	India
CX230	Xian	Philippines
CX231	Xian	Philippines
CX233	Xian	Philippines
CX235	Xian	Philippines
CX236	Xian	India
CX24	Xian	India
CX241	Geng	Brazil
CX242	Admix	Philippines
CX247	Xian	Ghana
CX248	Geng	Philippines
CX249	Xian	China
CX250	Xian	China
CX251	Geng	China
CX254	Xian	_no_info
CX255	Xian	_no_info
CX256	Xian	_no_info
CX260	Geng	_no_info
CX261	Admix	_no_info
CX262	Geng	Brazil
CX263	Xian	Malaysia
CX265	Xian	Colombia
CX266	Geng	Philippines
CX267	Xian	India
CX268	Xian	Brazil
CX269	Geng	Brazil
CX270	Xian	Taian
CX28	Xian	Korea
CX280	Admix	Brazil
CX282	Geng	China
CX283	Geng	_no_info
CX284	Geng	China
CX285	Geng	China
CX287	Geng	China
CX288	Xian	India
CX289	Xian	_no_info
CX29	Geng	Korea
CX290	Xian	China
CX291	Xian	China
CX292	Xian	_no_info
CX293	Xian	_no_info
CX294	Xian	_no_info
CX295	Xian	_no_info
CX296	Xian	Philippines
CX297	Xian	_no_info
CX298	Xian	_no_info
CX3	Xian	Bangladesh
CX301	Xian	_no_info
CX302	Xian	_no_info
CX303	Xian	China
CX304	Xian	China
CX306	Geng	China
CX309	Admix	_no_info
CX310	Xian	_no_info
CX312	Xian	_no_info
CX313	Xian	China
CX314	Xian	China
CX315	Geng	North Korea
CX316	Admix	Malaysia
CX317	Admix	Malaysia
CX318	Xian	China
CX32	Geng	Myanmar
CX322	Xian	_no_info
CX328	Xian	China
CX329	Geng	China
CX33	Xian	Myanmar
CX330	Geng	Japan
CX334	Geng	_no_info
CX335	Xian	_no_info
CX336	Xian	_no_info
CX337	Xian	_no_info
CX339	Xian	_no_info
CX34	Xian	Sri Lanka
CX340	Xian	China
CX341	Xian	China
CX342	Xian	China
CX343	Xian	China
CX344	Geng	China
CX345	Geng	China
CX346	Xian	China
CX347	Xian	China
CX348	Xian	China
CX349	Xian	_no_info
CX351	Geng	China
CX353	Geng	Viet Nam
CX354	Geng	Viet Nam
CX355	Geng	China
CX357	Xian	Philippines
CX358	Xian	Philippines
CX359	Geng	China
CX360	Xian	_no_info
CX361	Xian	_no_info
CX362	Xian	_no_info
CX363	Xian	_no_info
CX364	Xian	_no_info
CX366	Xian	China
CX367	Geng	China
CX368	AUS	India
CX369	Xian	Philippines
CX37	Xian	Viet Nam
CX370	Xian	China
CX372	Geng	Cote d'Ivoire
CX373	Geng	Cote d'Ivoire
CX374	Geng	Cote d'Ivoire
CX375	Xian	Cote d'Ivoire
CX377	Xian	Cote d'Ivoire
CX379	Xian	Mali
CX380	Geng	China
CX381	Xian	Mali
CX382	Xian	_no_info
CX383	Geng	China
CX384	Geng	China
CX386	Xian	China
CX387	Xian	_no_info
CX388	Xian	Thailand
CX389	Geng	China
CX390	Xian	China
CX391	Geng	China
CX392	Xian	_no_info
CX393	Xian	China
CX394	Xian	China
CX395	Admix	China
CX396	Geng	Japan
CX397	Geng	China
CX403	Xian	Philippines
CX42	Xian	Philippines
CX43	Xian	Philippines
CX44	Xian	Philippines
CX441	Geng	_no_info
CX453	Geng	_no_info
CX46	Admix	Pakistan
CX462	Xian	_no_info
CX463	Xian	_no_info
CX464	Xian	_no_info
CX465	Xian	_no_info
CX467	Xian	_no_info
CX469	Xian	_no_info
CX47	Geng	China
CX472	Xian	_no_info
CX474	Xian	_no_info
CX475	Xian	_no_info
CX477	Xian	_no_info
CX478	Xian	_no_info
CX479	Xian	_no_info
CX48	Xian	China
CX480	Xian	_no_info
CX481	Xian	_no_info
CX482	Xian	_no_info
CX484	Xian	_no_info
CX485	Xian	_no_info
CX486	Xian	_no_info
CX492	Geng	_no_info
CX493	Geng	_no_info
CX494	Geng	_no_info
CX495	Geng	_no_info
CX496	Geng	_no_info
CX497	Geng	_no_info
CX498	Geng	_no_info
CX499	Geng	_no_info
CX50	Xian	China
CX500	Geng	_no_info
CX501	Geng	_no_info
CX502	Geng	_no_info
CX503	Geng	_no_info
CX505	Xian	_no_info
CX506	Xian	_no_info
CX507	Xian	_no_info
CX508	Xian	_no_info
CX509	Xian	_no_info
CX510	Xian	_no_info
CX511	Xian	_no_info
CX512	Xian	_no_info
CX513	Xian	_no_info
CX514	Xian	_no_info
CX515	Xian	_no_info
CX516	Xian	_no_info
CX517	Geng	_no_info
CX519	Geng	_no_info
CX520	Geng	_no_info
CX522	Geng	_no_info
CX534	Geng	China
CX535	Geng	_no_info
CX536	Geng	_no_info
CX538	Xian	_no_info
CX54	Xian	China
CX540	Xian	_no_info
CX541	Xian	_no_info
CX542	Xian	China
CX546	Geng	_no_info
CX548	Xian	China
CX549	Xian	_no_info
CX55	Xian	China
CX550	Xian	_no_info
CX551	Geng	_no_info
CX552	Geng	_no_info
CX553	Geng	_no_info
CX554	Xian	_no_info
CX555	Geng	_no_info
CX556	Geng	_no_info
CX557	Geng	_no_info
CX559	Xian	_no_info
CX76	Xian	Sri Lanka
CX78	Geng	USA
CX79	Xian	Viet Nam
CX8	Xian	China
CX80	Xian	Viet Nam
CX82	Xian	Viet Nam
CX84	Xian	Viet Nam
CX86	Xian	Viet Nam
CX87	Xian	Viet Nam
CX88	Xian	China
CX89	Xian	USA
CX9	Xian	China
CX90	Xian	Nepal
CX91	Xian	India
CX92	Xian	India
CX93	Xian	India
CX97	Xian	India

## Sheet: Table S2
Table S2.MRL ARL and TRN mean comparison results
Trait	Population	Geng	Aus	Admix
MRL	Xian	0.73	1.5e-05	0.097
	Geng		1.1e-05	0.085
	Aus			0.094
ARL	Xian	0.046	3.2e-05	0.27
	Geng		1.9e-06	0.0038
	Aus			0.0051
TRN	Xian	0.19	1.2e-05	0.43
	Geng		7.3e-07	0.76
	Aus			0.0029

## Sheet: Table S3
Table S3. All significant loci of root traits detected by two models
Trait	Chromosome	Lead SNP (bp)	Model	P value	QTL name	Know genes/QTL
MRL	1	30384232	GLM	2.95e-09	qMRL1.1
		30384232	MLM	9.0911e-08
		31258476	GLM	1.40043e-08	qMRL1.2
		31258476	MLM	1.47614e-06
	2	9023272	GLM	1.91133e-07	qMRL2.1
		27252834	MLM	2.88173e-06	qMRL2.2
	3	13180766	GLM	1.54543e-08	qMRL3.1
		13180766	MLM	4.8171e-07
		26623430	GLM	1.5101e-08	qMRL3.2	OsGNOM1
		26623430	MLM	3.70193e-06
		28214674	GLM	2.17401e-09	qMRL3.3
		28214674	MLM	2.84229e-06
	4	28044674	GLM	9.93189e-06	qMRL4.2
		34986846	GLM	7.43343e-06	qMRL4.1	OsARF12
		34983993	MLM	5.16592e-06
	5	4659675	GLM	1.12716e-07	qMRL5.1
		5365256	GLM	4.26695e-06	qMRL5.2
	6	700538	GLM	8.14674e-06	qMRL6.1
		9602892	GLM	7.83271e-06	qMRL6.2	OsEXPA17
		11128959	GLM	4.6305e-06	qMRL6.3
	7	9145116	GLM	3.65403e-07	qMRL71
		9145116	MLM	3.05516e-06
	8	21059648	GLM	9.96675e-06	qMRL8.2
		27833555	GLM	1.57887e-07	qMRL8.1	qRL8.1
		27836609	MLM	7.38621e-06
	9	22787317	GLM	2.05082e-06	qMRL9.1
	10	310060448	GLM	1.4588e-07	qMRL10.1	OsPT8
	11	6522134	GLM	4.21195e-06	qMRL11.1
		19861221	GLM	5.86755e-06	qMRL11..2
		23652169	GLM	5.30881e-06	qMRL11.3
	12	22594460	GLM	2.01069e-06	qMRL12.1
ARL	1	30377471	GLM	1.13e-07	qARL1.1
		30377471	MLM	1.47856e-06
	3	13180766	GLM	1.09e-06	qARL3.1
	4	23757149	GLM	6.51e-06	qARL4.1
		34979157	GLM	9.29e-06	qARL4.2
	6	700538	GLM	3.92e-06	qARL6.1
	7	784779	GLM	2.41e-06	qARL7.1
		9286846	GLM	2.83e-06	qARL7.2
		25345132	GLM	2.91e-06	qARL7.3
	8	21774149	GLM	7.47e-06	qARL8.1
	9	7252407	GLM	4.49e-06	qARL9.1
		7252407	MLM	1.76596e-06
	10	16575178	GLM	5.23e-06	qARL10.1
	11	9060254	GLM	1.52e-06	qARL11.1
TRN	1	18498114	GLM	7.77491e-06	qTRN1.1
	2	4289533	GLM	3.93439e-06	qTRN2.1
		24478341	GLM	2.05247e-06	qTRN2.2
	6	27472743	GLM	4.88699e-06	qTRN6.1
	9	4342978	GLM	2.77975e-06	qTRN9.1
		4342978	MLM	8.02161e-06
		7013956	GLM	8.78174e-06	qTRN9.3
		9220591	GLM	5.53e-06	qTRN9.2
		9220591	MLM	7.45e-06
	11	9292368	GLM	1.73e-07	qTRN11.1
		9292368	MLM	2.32e-06

## Sheet: Table S4
Table S4. Significant SNPs above the threshold line in MLM and GLM
Model	Trait	SNP	Chr	Pos(bp)	REF	ALT	Effect	SE	P_value
GLM	MRL	30006584	1	30006584	A	G	1.95	0.42	4.57791e-06
GLM	MRL	30006771	1	30006771	A	G	1.99	0.42	2.81605e-06
GLM	MRL	30007125	1	30007125	A	G	1.8	0.39	5.41523e-06
GLM	MRL	30007553	1	30007553	A	C	2.13	0.44	2.01797e-06
GLM	MRL	30009563	1	30009563	G	C	1.75	0.37	4.12107e-06
GLM	MRL	30018193	1	30018193	A	G	1.64	0.35	4.90977e-06
GLM	MRL	30018662	1	30018662	T	A	1.72	0.34	7.96315e-07
GLM	MRL	30047081	1	30047081	C	T	1.94	0.39	6.99398e-07
GLM	MRL	30052538	1	30052538	A	G	1.92	0.37	3.59388e-07
GLM	MRL	30054035	1	30054035	C	T	1.85	0.37	1.05562e-06
GLM	MRL	30061622	1	30061622	T	C	1.89	0.39	2.28219e-06
GLM	MRL	30089460	1	30089460	T	C	1.83	0.39	4.52229e-06
GLM	MRL	30099996	1	30099996	A	G	1.82	0.39	5.4901e-06
GLM	MRL	30100701	1	30100701	G	A	-1.47	0.31	2.61681e-06
GLM	MRL	30162608	1	30162608	T	G	1.92	0.37	3.58205e-07
GLM	MRL	30162648	1	30162648	T	G	2.07	0.4	3.82686e-07
GLM	MRL	30167236	1	30167236	C	T	2.02	0.37	8.20504e-08
GLM	MRL	30167238	1	30167238	C	T	2.07	0.43	2.6561e-06
GLM	MRL	30167240	1	30167240	C	T	2.07	0.45	6.49036e-06
GLM	MRL	30168120	1	30168120	A	T	1.85	0.36	6.18608e-07
GLM	MRL	30185118	1	30185118	A	T	-1.98	0.4	1.36421e-06
GLM	MRL	30185176	1	30185176	A	C	2.13	0.4	1.81762e-07
GLM	MRL	30196995	1	30196995	A	T	1.5	0.33	8.8287e-06
GLM	MRL	30209745	1	30209745	T	C	1.68	0.35	1.84368e-06
GLM	MRL	30215365	1	30215365	A	G	2.05	0.4	4.2575e-07
GLM	MRL	30275857	1	30275857	A	G	1.51	0.33	5.68685e-06
GLM	MRL	30297146	1	30297146	T	C	1.96	0.4	1.27775e-06
GLM	MRL	30319874	1	30319874	T	C	2.22	0.4	4.70727e-08
GLM	MRL	30372612	1	30372612	A	G	1.51	0.33	7.97802e-06
GLM	MRL	30373085	1	30373085	T	C	1.51	0.33	5.66835e-06
GLM	MRL	30373319	1	30373319	T	C	1.42	0.31	8.48345e-06
GLM	MRL	30376069	1	30376069	A	C	2.32	0.38	2.1341e-09
GLM	MRL	30377435	1	30377435	C	T	2.06	0.4	4.00328e-07
GLM	MRL	30377471	1	30377471	T	A	2.15	0.36	6.16901e-09
GLM	MRL	30377553	1	30377553	A	G	1.94	0.4	1.59573e-06
GLM	MRL	30377769	1	30377769	T	C	2.21	0.39	2.69135e-08
GLM	MRL	30379578	1	30379578	A	C	2.09	0.4	3.7534e-07
GLM	MRL	30379791	1	30379791	T	C	2.48	0.41	4.352e-09
GLM	MRL	30383390	1	30383390	G	A	1.94	0.37	3.63109e-07
GLM	MRL	30384232	1	30384232	C	T	2.47	0.41	2.9526e-09
GLM	MRL	30384335	1	30384335	T	C	1.68	0.37	7.58557e-06
GLM	MRL	30385605	1	30385605	G	T	1.87	0.37	7.84966e-07
GLM	MRL	30386167	1	30386167	A	G	2.18	0.41	1.83271e-07
GLM	MRL	30386986	1	30386986	A	C	1.99	0.39	4.16713e-07
GLM	MRL	30396096	1	30396096	C	T	2.01	0.39	4.42975e-07
GLM	MRL	30396475	1	30396475	C	T	2.01	0.4	6.32255e-07
GLM	MRL	30397731	1	30397731	C	T	2.1	0.41	4.18154e-07
GLM	MRL	30405136	1	30405136	T	G	1.98	0.38	3.32376e-07
GLM	MRL	30405464	1	30405464	A	G	2.51	0.42	3.66896e-09
GLM	MRL	30406451	1	30406451	C	G	2.07	0.41	6.77143e-07
GLM	MRL	30411842	1	30411842	A	C	2.02	0.39	4.69e-07
GLM	MRL	30411956	1	30411956	T	C	2.08	0.39	1.72232e-07
GLM	MRL	30412403	1	30412403	G	A	1.64	0.34	1.60734e-06
GLM	MRL	30425459	1	30425459	A	G	1.54	0.33	6.00673e-06
GLM	MRL	30507526	1	30507526	T	C	1.64	0.32	3.92834e-07
GLM	MRL	30510954	1	30510954	G	T	2.04	0.41	1.15329e-06
GLM	MRL	30516128	1	30516128	A	G	2.38	0.41	1.33014e-08
GLM	MRL	30517642	1	30517642	T	G	1.83	0.4	4.92528e-06
GLM	MRL	30517849	1	30517849	T	C	2.43	0.41	1.02285e-08
GLM	MRL	30563797	1	30563797	G	A	2.02	0.43	4.43138e-06
GLM	MRL	30571143	1	30571143	A	G	1.76	0.39	9.63963e-06
GLM	MRL	30571617	1	30571617	T	C	2.02	0.41	1.13282e-06
GLM	MRL	30571731	1	30571731	G	T	1.87	0.39	2.70999e-06
GLM	MRL	30618785	1	30618785	G	C	2.18	0.4	1.06265e-07
GLM	MRL	30655024	1	30655024	G	A	2.06	0.38	1.26175e-07
GLM	MRL	30694645	1	30694645	C	T	1.8	0.37	1.6753e-06
GLM	MRL	30733258	1	30733258	C	T	1.8	0.39	5.7633e-06
GLM	MRL	30742410	1	30742410	T	C	-1.14	0.24	4.36906e-06
GLM	MRL	30807173	1	30807173	A	G	1.64	0.36	8.96802e-06
GLM	MRL	30809261	1	30809261	A	G	1.86	0.39	2.81947e-06
GLM	MRL	30812840	1	30812840	A	T	1.76	0.34	5.47509e-07
GLM	MRL	30813003	1	30813003	T	C	1.86	0.39	2.49182e-06
GLM	MRL	30813202	1	30813202	A	G	1.63	0.36	6.28045e-06
GLM	MRL	30813442	1	30813442	C	A	1.75	0.37	3.34361e-06
GLM	MRL	30813960	1	30813960	G	C	1.7	0.38	8.29339e-06
GLM	MRL	30814498	1	30814498	A	G	2.04	0.37	6.96727e-08
GLM	MRL	30815212	1	30815212	G	T	1.68	0.36	3.52138e-06
GLM	MRL	30816694	1	30816694	T	C	1.82	0.37	1.42211e-06
GLM	MRL	30957839	1	30957839	G	A	1.8	0.37	1.46733e-06
GLM	MRL	30958127	1	30958127	T	C	1.75	0.36	1.84527e-06
GLM	MRL	30959285	1	30959285	A	G	1.91	0.38	8.73121e-07
GLM	MRL	30962672	1	30962672	A	G	1.75	0.36	2.10805e-06
GLM	MRL	30964552	1	30964552	C	A	2	0.37	1.33764e-07
GLM	MRL	30966277	1	30966277	T	G	1.98	0.34	1.66354e-08
GLM	MRL	30970174	1	30970174	C	T	1.84	0.36	6.19724e-07
GLM	MRL	30970193	1	30970193	A	C	1.9	0.37	6.14995e-07
GLM	MRL	30970313	1	30970313	T	G	1.76	0.38	5.6459e-06
GLM	MRL	30970483	1	30970483	T	C	1.78	0.38	4.22961e-06
GLM	MRL	31165770	1	31165770	T	C	1.98	0.37	1.62695e-07
GLM	MRL	31166077	1	31166077	T	C	1.9	0.38	9.94891e-07
GLM	MRL	31167526	1	31167526	T	G	1.74	0.39	9.78772e-06
GLM	MRL	31172400	1	31172400	T	G	1.86	0.38	1.22096e-06
GLM	MRL	31172586	1	31172586	T	C	1.87	0.37	6.24168e-07
GLM	MRL	31243728	1	31243728	C	T	2.03	0.45	9.40169e-06
GLM	MRL	31246523	1	31246523	A	G	1.87	0.37	5.91813e-07
GLM	MRL	31258476	1	31258476	T	C	2.14	0.37	1.40043e-08
GLM	MRL	31258516	1	31258516	T	C	1.75	0.36	1.69377e-06
GLM	MRL	31260230	1	31260230	T	G	1.51	0.34	9.27301e-06
GLM	MRL	31326136	1	31326136	C	T	1.7	0.38	8.94847e-06
GLM	MRL	31332666	1	31332666	A	G	1.87	0.4	3.50786e-06
GLM	MRL	31480693	1	31480693	G	C	1.73	0.36	2.97223e-06
GLM	MRL	31491670	1	31491670	C	T	1.82	0.34	1.49816e-07
GLM	MRL	31564418	1	31564418	G	A	1.57	0.32	2.08296e-06
GLM	MRL	31680625	1	31680625	G	C	1.63	0.34	3.03481e-06
GLM	MRL	31688761	1	31688761	A	T	1.53	0.34	9.97389e-06
GLM	MRL	31690325	1	31690325	A	C	1.73	0.37	4.06803e-06
GLM	MRL	52290309	2	9019386	C	T	1.62	0.32	6.47443e-07
GLM	MRL	52294195	2	9023272	G	T	1.65	0.31	1.91133e-07
GLM	MRL	52329403	2	9058480	T	C	1.41	0.3	2.94487e-06
GLM	MRL	52331147	2	9060224	G	A	1.59	0.33	2.66264e-06
GLM	MRL	90914054	3	11705881	G	T	-1.11	0.25	8.25487e-06
GLM	MRL	92090860	3	12882687	C	T	2.34	0.51	7.49254e-06
GLM	MRL	92358211	3	13150038	G	A	1.73	0.39	9.24443e-06
GLM	MRL	92385276	3	13177103	G	A	2.03	0.39	2.5316e-07
GLM	MRL	92388939	3	13180766	A	T	-1.25	0.22	1.54543e-08
GLM	MRL	92388996	3	13180823	A	T	-1.24	0.22	1.98236e-08
GLM	MRL	92390345	3	13182172	A	G	0.97	0.21	6.73721e-06
GLM	MRL	92391628	3	13183455	C	T	-1.24	0.22	3.36963e-08
GLM	MRL	92392817	3	13184644	T	A	0.99	0.21	2.45068e-06
GLM	MRL	92392824	3	13184651	T	A	0.99	0.21	2.70047e-06
GLM	MRL	92393246	3	13185073	T	C	-1.21	0.23	2.12701e-07
GLM	MRL	92396103	3	13187930	G	A	0.95	0.21	8.06389e-06
GLM	MRL	92396189	3	13188016	G	A	-1.02	0.23	7.47081e-06
GLM	MRL	92397586	3	13189413	T	G	-1.06	0.23	5.8758e-06
GLM	MRL	92398399	3	13190226	A	G	-1.04	0.22	3.79945e-06
GLM	MRL	92399462	3	13191289	A	G	-1.06	0.23	4.58245e-06
GLM	MRL	92399710	3	13191537	C	T	0.96	0.21	8.08491e-06
GLM	MRL	92400923	3	13192750	T	C	-1.06	0.23	4.32769e-06
GLM	MRL	92401179	3	13193006	C	G	0.97	0.21	6.72318e-06
GLM	MRL	92401727	3	13193554	A	G	-1.05	0.23	6.16926e-06
GLM	MRL	92401905	3	13193732	G	A	0.97	0.21	6.29509e-06
GLM	MRL	92403643	3	13195470	T	A	-1.02	0.23	9.04096e-06
GLM	MRL	92404037	3	13195864	C	A	-1.03	0.23	5.78146e-06
GLM	MRL	92404075	3	13195902	A	G	1	0.21	2.91222e-06
GLM	MRL	92404103	3	13195930	G	T	-1.07	0.23	3.00976e-06
GLM	MRL	92404124	3	13195951	G	T	0.95	0.21	8.3835e-06
GLM	MRL	92404127	3	13195954	A	G	0.94	0.21	9.63452e-06
GLM	MRL	92404139	3	13195966	A	G	0.99	0.21	2.89548e-06
GLM	MRL	92404167	3	13195994	A	G	0.97	0.21	4.20297e-06
GLM	MRL	92404176	3	13196003	G	C	0.99	0.21	3.26109e-06
GLM	MRL	92404202	3	13196029	C	T	0.95	0.21	7.5839e-06
GLM	MRL	92404747	3	13196574	G	T	1.08	0.2	1.67879e-07
GLM	MRL	92405274	3	13197101	G	A	-0.98	0.22	8.44877e-06
GLM	MRL	92411133	3	13202960	C	T	2.18	0.43	6.59001e-07
GLM	MRL	92414607	3	13206434	C	T	-1.05	0.23	4.93228e-06
GLM	MRL	92426015	3	13217842	G	A	-1.06	0.23	6.47153e-06
GLM	MRL	92426016	3	13217843	G	A	-1.03	0.23	9.51865e-06
GLM	MRL	92440500	3	13232327	C	T	-1.02	0.22	7.72994e-06
GLM	MRL	92444278	3	13236105	C	A	-1.12	0.23	1.23434e-06
GLM	MRL	92460464	3	13252291	G	A	-1.03	0.22	4.82399e-06
GLM	MRL	92462819	3	13254646	G	A	-1.09	0.22	1.51399e-06
GLM	MRL	92466091	3	13257918	C	T	-1.03	0.23	9.1653e-06
GLM	MRL	92485939	3	13277766	A	T	-1.07	0.23	4.67186e-06
GLM	MRL	92489473	3	13281300	G	A	1.18	0.23	2.65759e-07
GLM	MRL	92490203	3	13282030	C	T	1.13	0.23	1.17111e-06
GLM	MRL	92491033	3	13282860	G	T	1.08	0.23	3.94076e-06
GLM	MRL	92493874	3	13285701	C	T	-1.15	0.22	3.48375e-07
GLM	MRL	92494293	3	13286120	G	A	-1.16	0.22	2.09944e-07
GLM	MRL	92496323	3	13288150	G	A	1.12	0.23	1.73655e-06
GLM	MRL	92500116	3	13291943	C	T	-0.99	0.21	5.71705e-06
GLM	MRL	92505808	3	13297635	C	T	1.05	0.23	8.04956e-06
GLM	MRL	92514485	3	13306312	T	A	-1.13	0.22	6.65802e-07
GLM	MRL	92520356	3	13312183	G	A	1.15	0.22	4.15969e-07
GLM	MRL	92520392	3	13312219	T	C	1.13	0.22	6.92745e-07
GLM	MRL	92520729	3	13312556	T	C	-1.01	0.22	4.42169e-06
GLM	MRL	92520781	3	13312608	C	A	1.21	0.22	1.04113e-07
GLM	MRL	92520809	3	13312636	A	T	1.17	0.22	2.72767e-07
GLM	MRL	92520840	3	13312667	C	T	-1.16	0.22	3.37192e-07
GLM	MRL	92520904	3	13312731	T	C	1.09	0.23	2.06362e-06
GLM	MRL	92521116	3	13312943	T	C	1.07	0.22	2.56049e-06
GLM	MRL	92521147	3	13312974	C	T	1.03	0.22	5.71047e-06
GLM	MRL	92521152	3	13312979	C	T	-1.07	0.22	1.3327e-06
GLM	MRL	92521199	3	13313026	A	G	1.06	0.22	3.40154e-06
GLM	MRL	92521202	3	13313029	A	G	1.05	0.22	3.99681e-06
GLM	MRL	92521313	3	13313140	A	G	1.12	0.22	8.97814e-07
GLM	MRL	92521482	3	13313309	G	A	1	0.22	7.79067e-06
GLM	MRL	92521604	3	13313431	T	C	1.07	0.23	3.1589e-06
GLM	MRL	92521624	3	13313451	T	C	1.03	0.23	7.42133e-06
GLM	MRL	92521861	3	13313688	C	T	1.01	0.22	8.19062e-06
GLM	MRL	92522117	3	13313944	T	C	1.08	0.22	2.05271e-06
GLM	MRL	92522186	3	13314013	T	C	1.06	0.23	3.8937e-06
GLM	MRL	92522202	3	13314029	G	A	1.1	0.22	1.1634e-06
GLM	MRL	92522253	3	13314080	C	T	1.09	0.23	2.12864e-06
GLM	MRL	92522346	3	13314173	C	T	1.21	0.22	9.17886e-08
GLM	MRL	92522356	3	13314183	A	G	1.22	0.22	8.1927e-08
GLM	MRL	92522395	3	13314222	C	T	1.07	0.22	2.37867e-06
GLM	MRL	92522912	3	13314739	A	G	1.17	0.22	2.68535e-07
GLM	MRL	92523030	3	13314857	G	A	1.22	0.23	1.08157e-07
GLM	MRL	92523049	3	13314876	G	A	1.14	0.22	5.14093e-07
GLM	MRL	92523133	3	13314960	C	T	1.19	0.22	1.62651e-07
GLM	MRL	92523164	3	13314991	C	T	1.16	0.22	3.10572e-07
GLM	MRL	92523176	3	13315003	G	A	1.19	0.22	1.60907e-07
GLM	MRL	92523189	3	13315016	T	A	1.2	0.22	1.3001e-07
GLM	MRL	92523241	3	13315068	T	C	1.2	0.22	1.41095e-07
GLM	MRL	92523308	3	13315135	C	T	1.19	0.22	1.70584e-07
GLM	MRL	92523382	3	13315209	T	C	1.08	0.23	3.0722e-06
GLM	MRL	92523385	3	13315212	G	A	1.05	0.23	6.29004e-06
GLM	MRL	92524003	3	13315830	G	A	1.09	0.23	2.90826e-06
GLM	MRL	92538642	3	13330469	C	T	1.9	0.38	1.20567e-06
GLM	MRL	92662754	3	13454581	G	A	1.18	0.24	2.1402e-06
GLM	MRL	92662945	3	13454772	C	T	-1.04	0.23	7.05137e-06
GLM	MRL	92665285	3	13457112	C	T	-1.04	0.23	6.48924e-06
GLM	MRL	92770257	3	13562084	G	A	1.04	0.23	7.79665e-06
GLM	MRL	92806571	3	13598398	C	T	-1.08	0.23	2.89415e-06
GLM	MRL	92806864	3	13598691	T	C	-1.02	0.23	8.5446e-06
GLM	MRL	92822087	3	13613914	T	C	-1.11	0.23	2.24107e-06
GLM	MRL	92824463	3	13616290	C	T	1.03	0.23	9.94356e-06
GLM	MRL	92828623	3	13620450	C	T	-1.05	0.23	6.29571e-06
GLM	MRL	92847392	3	13639219	A	G	1.04	0.23	7.67364e-06
GLM	MRL	92850175	3	13642002	C	T	1.11	0.23	1.96109e-06
GLM	MRL	92853934	3	13645761	G	A	2	0.39	4.46984e-07
GLM	MRL	92853971	3	13645798	G	A	1.14	0.23	1.28484e-06
GLM	MRL	92861085	3	13652912	C	T	-1.13	0.22	3.92559e-07
GLM	MRL	92866524	3	13658351	G	T	-1.13	0.23	1.19747e-06
GLM	MRL	92871840	3	13663667	A	G	-1.04	0.23	5.76249e-06
GLM	MRL	92874021	3	13665848	T	A	-1.11	0.23	1.84634e-06
GLM	MRL	92879755	3	13671582	G	A	-1.02	0.22	7.77478e-06
GLM	MRL	92880182	3	13672009	G	A	-1.09	0.23	2.52406e-06
GLM	MRL	92882317	3	13674144	T	G	-1.02	0.23	9.75838e-06
GLM	MRL	105561940	3	26353767	G	A	1.42	0.31	7.40791e-06
GLM	MRL	105562254	3	26354081	C	T	1.49	0.33	7.47947e-06
GLM	MRL	105562258	3	26354085	G	A	1.51	0.33	5.47078e-06
GLM	MRL	105562501	3	26354328	C	T	1.5	0.32	4.88964e-06
GLM	MRL	105562894	3	26354721	C	T	1.53	0.33	4.33873e-06
GLM	MRL	105562915	3	26354742	A	G	1.54	0.33	3.46173e-06
GLM	MRL	105563193	3	26355020	C	T	1.51	0.32	2.94024e-06
GLM	MRL	105566525	3	26358352	G	C	1.48	0.32	6.67832e-06
GLM	MRL	105623815	3	26415642	A	T	-1.26	0.25	7.58605e-07
GLM	MRL	105671632	3	26463459	C	T	-1.19	0.25	2.4656e-06
GLM	MRL	105671898	3	26463725	G	A	-1.25	0.25	1.1464e-06
GLM	MRL	105672151	3	26463978	C	T	-1.16	0.25	7.15299e-06
GLM	MRL	105673548	3	26465375	G	A	-1.26	0.25	1.14188e-06
GLM	MRL	105676471	3	26468298	A	G	-1.17	0.25	4.13048e-06
GLM	MRL	105677546	3	26469373	A	G	-1.07	0.23	5.90498e-06
GLM	MRL	105677576	3	26469403	C	T	-1.08	0.24	7.85162e-06
GLM	MRL	105677588	3	26469415	A	G	-1.21	0.25	1.21119e-06
GLM	MRL	105677738	3	26469565	G	T	-1.14	0.25	9.22467e-06
GLM	MRL	105685356	3	26477183	T	C	-1.12	0.25	9.02515e-06
GLM	MRL	105685584	3	26477411	A	G	-1.17	0.25	4.28345e-06
GLM	MRL	105685625	3	26477452	A	G	-1.18	0.25	3.00189e-06
GLM	MRL	105685626	3	26477453	A	C	-1.18	0.25	3.00189e-06
GLM	MRL	105686150	3	26477977	G	A	-1.26	0.25	9.21022e-07
GLM	MRL	105687081	3	26478908	G	T	-1.16	0.25	3.48847e-06
GLM	MRL	105687303	3	26479130	C	G	-1.13	0.25	8.21447e-06
GLM	MRL	105687328	3	26479155	T	C	-1.18	0.25	2.71049e-06
GLM	MRL	105687338	3	26479165	A	G	-1.29	0.24	2.27867e-07
GLM	MRL	105687402	3	26479229	G	A	-1.1	0.24	7.83772e-06
GLM	MRL	105687422	3	26479249	T	C	-1.1	0.24	6.54593e-06
GLM	MRL	105694312	3	26486139	C	A	-1.09	0.23	3.19189e-06
GLM	MRL	105695178	3	26487005	T	C	-1.05	0.23	9.95693e-06
GLM	MRL	105706345	3	26498172	A	G	-1.14	0.25	7.18609e-06
GLM	MRL	105712117	3	26503944	G	A	-1.22	0.25	1.49885e-06
GLM	MRL	105712634	3	26504461	A	G	-1.32	0.25	2.7422e-07
GLM	MRL	105713142	3	26504969	C	T	-1.14	0.25	7.9295e-06
GLM	MRL	105714339	3	26506166	T	C	-1.14	0.24	2.4785e-06
GLM	MRL	105715994	3	26507821	A	G	-1.19	0.26	5.51324e-06
GLM	MRL	105716003	3	26507830	G	A	-1.25	0.26	1.717e-06
GLM	MRL	105716193	3	26508020	T	C	-1.13	0.25	5.98283e-06
GLM	MRL	105721518	3	26513345	A	G	-1.17	0.26	6.8017e-06
GLM	MRL	105724208	3	26516035	G	C	-1.25	0.25	9.79497e-07
GLM	MRL	105724246	3	26516073	A	G	-1.16	0.25	3.78608e-06
GLM	MRL	105724636	3	26516463	T	C	-1.02	0.23	9.66704e-06
GLM	MRL	105729470	3	26521297	C	G	-1.21	0.25	3.07431e-06
GLM	MRL	105729732	3	26521559	G	T	-1.09	0.24	8.79268e-06
GLM	MRL	105729831	3	26521658	C	G	-1.32	0.25	2.80875e-07
GLM	MRL	105730608	3	26522435	G	A	-1.3	0.25	4.38122e-07
GLM	MRL	105730635	3	26522462	T	C	-1.21	0.25	2.70316e-06
GLM	MRL	105730767	3	26522594	A	G	-1.24	0.25	1.5083e-06
GLM	MRL	105731157	3	26522984	A	G	-1.17	0.25	4.36515e-06
GLM	MRL	105743748	3	26535575	T	G	-1.16	0.25	4.6203e-06
GLM	MRL	105744869	3	26536696	A	G	-1.18	0.25	2.15408e-06
GLM	MRL	105792843	3	26584670	C	G	-1.14	0.24	3.51533e-06
GLM	MRL	105794091	3	26585918	A	G	-1.1	0.24	3.72657e-06
GLM	MRL	105796200	3	26588027	T	C	-1.21	0.25	1.62127e-06
GLM	MRL	105801359	3	26593186	T	C	-1.16	0.24	2.07223e-06
GLM	MRL	105801576	3	26593403	T	C	-1.08	0.24	7.00891e-06
GLM	MRL	105802235	3	26594062	G	A	-1.05	0.23	8.70978e-06
GLM	MRL	105803520	3	26595347	A	G	-1.08	0.23	5.36555e-06
GLM	MRL	105803546	3	26595373	T	C	-1.06	0.24	8.06123e-06
GLM	MRL	105803588	3	26595415	T	C	-1.08	0.24	7.24099e-06
GLM	MRL	105804448	3	26596275	A	G	-1.05	0.22	3.42097e-06
GLM	MRL	105806275	3	26598102	G	T	-1.18	0.24	1.53566e-06
GLM	MRL	105806639	3	26598466	C	T	-1.33	0.25	2.19067e-07
GLM	MRL	105806788	3	26598615	C	T	-1.2	0.24	7.00479e-07
GLM	MRL	105806879	3	26598706	T	C	-1.1	0.23	3.30238e-06
GLM	MRL	105806881	3	26598708	A	G	-1.1	0.23	3.30238e-06
GLM	MRL	105807074	3	26598901	A	G	-1.16	0.24	1.26195e-06
GLM	MRL	105807177	3	26599004	T	G	-1.25	0.23	1.59486e-07
GLM	MRL	105807231	3	26599058	C	T	-1.15	0.23	1.38297e-06
GLM	MRL	105807382	3	26599209	T	G	-1.18	0.23	6.60046e-07
GLM	MRL	105807978	3	26599805	A	G	-1.14	0.23	1.05856e-06
GLM	MRL	105808405	3	26600232	T	C	-0.98	0.21	4.79669e-06
GLM	MRL	105817619	3	26609446	G	T	-1.3	0.24	1.08843e-07
GLM	MRL	105817622	3	26609449	G	T	-1.31	0.24	5.87509e-08
GLM	MRL	105817623	3	26609450	G	A	-1.31	0.24	6.77071e-08
GLM	MRL	105817626	3	26609453	C	T	-1.31	0.24	6.77071e-08
GLM	MRL	105817628	3	26609455	A	G	-1.37	0.24	3.13511e-08
GLM	MRL	105817923	3	26609750	A	T	-1.09	0.24	7.91956e-06
GLM	MRL	105818800	3	26610627	T	C	-1.09	0.24	6.51056e-06
GLM	MRL	105818911	3	26610738	A	G	-1.1	0.23	3.33978e-06
GLM	MRL	105818912	3	26610739	T	C	-1.09	0.23	3.81616e-06
GLM	MRL	105819619	3	26611446	C	T	-1.17	0.24	1.75426e-06
GLM	MRL	105823654	3	26615481	A	T	-1.05	0.23	8.84209e-06
GLM	MRL	105823910	3	26615737	T	C	-1.06	0.23	6.8232e-06
GLM	MRL	105823912	3	26615739	T	A	-1.06	0.23	6.38407e-06
GLM	MRL	105824567	3	26616394	A	G	-1.24	0.23	2.15205e-07
GLM	MRL	105824974	3	26616801	C	T	-1.15	0.24	1.81958e-06
GLM	MRL	105827357	3	26619184	G	A	-1.19	0.25	1.81606e-06
GLM	MRL	105828225	3	26620052	G	A	-1.09	0.23	3.09204e-06
GLM	MRL	105828738	3	26620565	G	A	-1.07	0.23	6.17452e-06
GLM	MRL	105829952	3	26621779	T	C	-1.08	0.23	4.4241e-06
GLM	MRL	105830216	3	26622043	G	A	-1.16	0.24	1.29424e-06
GLM	MRL	105830223	3	26622050	A	G	-1.2	0.24	6.83011e-07
GLM	MRL	105830393	3	26622220	A	G	-1.04	0.23	6.00133e-06
GLM	MRL	105831533	3	26623360	C	T	-1.07	0.23	6.30876e-06
GLM	MRL	105831593	3	26623420	A	G	-1.21	0.22	1.12677e-07
GLM	MRL	105831603	3	26623430	A	C	-1.29	0.22	1.5101e-08
GLM	MRL	105840048	3	26631875	G	C	-1.12	0.24	5.15866e-06
GLM	MRL	106016407	3	26808234	C	T	-1.01	0.22	5.29282e-06
GLM	MRL	106019032	3	26810859	T	C	1.17	0.23	7.18003e-07
GLM	MRL	106025015	3	26816842	A	G	1.08	0.24	6.9113e-06
GLM	MRL	106042550	3	26834377	A	T	-1.11	0.22	8.01964e-07
GLM	MRL	106051442	3	26843269	C	T	-1.04	0.22	3.61087e-06
GLM	MRL	106053265	3	26845092	T	G	-1.03	0.22	3.20113e-06
GLM	MRL	106075070	3	26866897	C	T	2.72	0.55	1.30205e-06
GLM	MRL	106377489	3	27169316	G	A	1.7	0.36	3.01518e-06
GLM	MRL	106381008	3	27172835	G	A	1.8	0.38	3.51502e-06
GLM	MRL	106388566	3	27180393	C	T	1.83	0.38	2.53109e-06
GLM	MRL	106389726	3	27181553	G	A	1.94	0.38	5.88646e-07
GLM	MRL	106410914	3	27202741	C	T	2.06	0.45	6.72852e-06
GLM	MRL	106546674	3	27338501	C	T	-1.01	0.22	8.03738e-06
GLM	MRL	106548977	3	27340804	T	A	1.43	0.31	6.43913e-06
GLM	MRL	106564837	3	27356664	G	A	1.92	0.39	9.83782e-07
GLM	MRL	106596442	3	27388269	T	A	1.8	0.39	4.75564e-06
GLM	MRL	106689675	3	27481502	A	C	1.37	0.3	6.19331e-06
GLM	MRL	106781558	3	27573385	G	T	1.5	0.31	2.56207e-06
GLM	MRL	106825412	3	27617239	G	A	1.57	0.32	1.42191e-06
GLM	MRL	106826322	3	27618149	T	C	1.61	0.33	1.77726e-06
GLM	MRL	106848810	3	27640637	C	G	1.64	0.33	6.8731e-07
GLM	MRL	106849171	3	27640998	G	A	1.53	0.34	8.53839e-06
GLM	MRL	106853665	3	27645492	A	G	1.5	0.33	7.4667e-06
GLM	MRL	106874426	3	27666253	G	A	1.45	0.32	5.69178e-06
GLM	MRL	106874768	3	27666595	C	T	1.62	0.3	1.26129e-07
GLM	MRL	106880282	3	27672109	C	T	1.52	0.32	2.26512e-06
GLM	MRL	106882631	3	27674458	G	A	1.44	0.32	8.40252e-06
GLM	MRL	106882643	3	27674470	G	T	1.44	0.32	8.40252e-06
GLM	MRL	106882671	3	27674498	G	A	1.44	0.32	8.40252e-06
GLM	MRL	106882677	3	27674504	C	T	1.44	0.32	8.40252e-06
GLM	MRL	106883199	3	27675026	G	C	1.43	0.32	9.93353e-06
GLM	MRL	106883323	3	27675150	C	T	1.44	0.31	6.28148e-06
GLM	MRL	107273150	3	28064977	C	T	1.68	0.31	1.09585e-07
GLM	MRL	107310474	3	28102301	C	T	1.8	0.3	6.19894e-09
GLM	MRL	107311180	3	28103007	T	C	1.35	0.29	4.74202e-06
GLM	MRL	107311246	3	28103073	C	T	1.32	0.29	5.28236e-06
GLM	MRL	107314967	3	28106794	C	T	1.46	0.3	2.08569e-06
GLM	MRL	107322591	3	28114418	G	A	1.36	0.3	7.0888e-06
GLM	MRL	107322852	3	28114679	T	A	1.31	0.29	7.54187e-06
GLM	MRL	107370243	3	28162070	A	G	1.35	0.29	4.17152e-06
GLM	MRL	107375884	3	28167711	T	C	1.42	0.29	1.88879e-06
GLM	MRL	107377592	3	28169419	G	A	-1.07	0.23	5.39791e-06
GLM	MRL	107384310	3	28176137	C	T	1.5	0.31	1.92402e-06
GLM	MRL	107399440	3	28191267	C	T	-1.1	0.24	8.26599e-06
GLM	MRL	107406113	3	28197940	G	A	1.47	0.3	1.29061e-06
GLM	MRL	107406197	3	28198024	T	C	1.61	0.29	7.77256e-08
GLM	MRL	107406230	3	28198057	G	A	1.5	0.3	1.14683e-06
GLM	MRL	107406578	3	28198405	G	A	1.46	0.3	2.28291e-06
GLM	MRL	107409821	3	28201648	G	A	1.46	0.31	4.82464e-06
GLM	MRL	107409863	3	28201690	G	A	1.98	0.35	4.49694e-08
GLM	MRL	107422847	3	28214674	C	T	2.15	0.35	2.17401e-09
GLM	MRL	107425020	3	28216847	A	T	1.56	0.3	4.27875e-07
GLM	MRL	107425113	3	28216940	C	T	1.5	0.29	3.09319e-07
GLM	MRL	107426911	3	28218738	G	A	1.53	0.3	5.2069e-07
GLM	MRL	107426990	3	28218817	G	A	1.46	0.31	2.97881e-06
GLM	MRL	107427030	3	28218857	C	G	1.36	0.3	5.88261e-06
GLM	MRL	107427120	3	28218947	G	A	1.51	0.3	5.94476e-07
GLM	MRL	107427331	3	28219158	G	C	1.4	0.3	3.64645e-06
GLM	MRL	107427367	3	28219194	T	C	1.37	0.3	5.65566e-06
GLM	MRL	107427433	3	28219260	C	A	1.48	0.3	1.46569e-06
GLM	MRL	107427555	3	28219382	G	A	1.47	0.3	9.38754e-07
GLM	MRL	107427680	3	28219507	C	T	1.39	0.29	3.35774e-06
GLM	MRL	107442756	3	28234583	G	A	1.36	0.3	6.27302e-06
GLM	MRL	107442759	3	28234586	T	A	1.36	0.3	6.27302e-06
GLM	MRL	107442808	3	28234635	G	A	1.44	0.3	1.58699e-06
GLM	MRL	107443852	3	28235679	G	A	1.35	0.3	8.99742e-06
GLM	MRL	107443893	3	28235720	C	T	1.43	0.3	3.41138e-06
GLM	MRL	107443972	3	28235799	C	T	1.43	0.3	2.31506e-06
GLM	MRL	107444033	3	28235860	A	G	1.37	0.3	5.27049e-06
GLM	MRL	107452047	3	28243874	G	A	1.37	0.3	7.24893e-06
GLM	MRL	107452571	3	28244398	G	A	1.49	0.29	4.96287e-07
GLM	MRL	107502560	3	28294387	G	A	1.75	0.36	1.53799e-06
GLM	MRL	107502739	3	28294566	C	A	1.76	0.36	1.76546e-06
GLM	MRL	107504097	3	28295924	G	A	1.67	0.35	3.31199e-06
GLM	MRL	107504888	3	28296715	C	T	1.84	0.35	2.21518e-07
GLM	MRL	107505039	3	28296866	C	T	1.94	0.36	1.15569e-07
GLM	MRL	107507988	3	28299815	C	T	1.79	0.37	1.51034e-06
GLM	MRL	107509052	3	28300879	C	T	1.76	0.36	1.67915e-06
GLM	MRL	107509320	3	28301147	G	A	1.7	0.36	3.17461e-06
GLM	MRL	107511219	3	28303046	C	G	1.73	0.36	1.86967e-06
GLM	MRL	107512569	3	28304396	C	T	1.81	0.38	2.34138e-06
GLM	MRL	107530374	3	28322201	G	A	1.86	0.41	6.01934e-06
GLM	MRL	107565585	3	28357412	G	A	-1.11	0.24	3.64477e-06
GLM	MRL	107612759	3	28404586	G	A	1.88	0.4	4.81018e-06
GLM	MRL	107619088	3	28410915	T	C	1.96	0.42	4.02373e-06
GLM	MRL	107619403	3	28411230	G	T	2.03	0.42	1.91724e-06
GLM	MRL	107625143	3	28416970	G	A	1.94	0.42	4.12324e-06
GLM	MRL	107633114	3	28424941	G	A	2	0.4	9.26475e-07
GLM	MRL	107658326	3	28450153	G	A	1.87	0.41	6.50005e-06
GLM	MRL	107892111	3	28683938	G	C	2.06	0.45	6.36945e-06
GLM	MRL	107947013	3	28738840	A	T	2	0.43	3.70492e-06
GLM	MRL	107952147	3	28743974	G	T	1.95	0.42	5.86363e-06
GLM	MRL	107981686	3	28773513	T	C	1.9	0.42	6.66683e-06
GLM	MRL	108003328	3	28795155	C	T	2.12	0.46	5.89662e-06
GLM	MRL	108048565	3	28840392	T	A	2.02	0.41	1.43491e-06
GLM	MRL	108063184	3	28855011	C	T	1.93	0.43	8.65027e-06
GLM	MRL	108098097	3	28889924	T	A	1.92	0.42	5.42587e-06
GLM	MRL	108102559	3	28894386	T	A	1.94	0.42	5.16652e-06
GLM	MRL	108107038	3	28898865	C	T	2.04	0.44	5.83822e-06
GLM	MRL	108110089	3	28901916	G	A	1.97	0.41	2.11298e-06
GLM	MRL	108110097	3	28901924	C	T	1.93	0.42	4.94743e-06
GLM	MRL	108110105	3	28901932	C	A	2.01	0.42	2.79647e-06
GLM	MRL	108110107	3	28901934	T	A	1.97	0.41	2.57592e-06
GLM	MRL	108110108	3	28901935	G	T	1.92	0.41	4.48638e-06
GLM	MRL	108115944	3	28907771	A	T	2.17	0.4	1.14383e-07
GLM	MRL	108115949	3	28907776	G	T	2.17	0.4	1.14383e-07
GLM	MRL	108115958	3	28907785	A	C	2.16	0.41	2.55375e-07
GLM	MRL	108127054	3	28918881	T	G	1.97	0.43	7.71742e-06
GLM	MRL	108127338	3	28919165	C	T	1.86	0.41	8.19038e-06
GLM	MRL	108127508	3	28919335	G	A	2.06	0.42	1.81136e-06
GLM	MRL	108166642	3	28958469	C	A	1.89	0.42	8.96489e-06
GLM	MRL	108166884	3	28958711	G	A	1.88	0.42	8.71716e-06
GLM	MRL	108212412	3	29004239	A	G	1.96	0.41	3.24516e-06
GLM	MRL	108215162	3	29006989	G	C	1.94	0.42	5.14699e-06
GLM	MRL	108218090	3	29009917	G	A	1.88	0.41	6.881e-06
GLM	MRL	108355253	3	29147080	G	A	1.96	0.42	3.25307e-06
GLM	MRL	108359947	3	29151774	C	A	2.04	0.42	1.66929e-06
GLM	MRL	108360029	3	29151856	C	G	2.03	0.42	2.00148e-06
GLM	MRL	108362294	3	29154121	G	A	1.98	0.42	2.76667e-06
GLM	MRL	108364271	3	29156098	A	C	1.98	0.43	5.43053e-06
GLM	MRL	108369844	3	29161671	G	T	1.92	0.42	5.69895e-06
GLM	MRL	108373407	3	29165234	G	C	2.07	0.43	1.99852e-06
GLM	MRL	108373836	3	29165663	T	C	2.03	0.42	1.77677e-06
GLM	MRL	108374260	3	29166087	G	T	2.06	0.41	7.72035e-07
GLM	MRL	108374584	3	29166411	G	A	1.91	0.41	5.58922e-06
GLM	MRL	108374902	3	29166729	G	A	2.1	0.41	4.1657e-07
GLM	MRL	108374928	3	29166755	G	A	1.94	0.41	3.95584e-06
GLM	MRL	108409329	3	29201156	A	G	1.9	0.42	8.24108e-06
GLM	MRL	108411831	3	29203658	A	T	1.88	0.42	8.77475e-06
GLM	MRL	108433055	3	29224882	G	A	1.92	0.41	3.86411e-06
GLM	MRL	108435544	3	29227371	C	T	1.9	0.4	2.28286e-06
GLM	MRL	108437146	3	29228973	G	A	2.01	0.39	5.76956e-07
GLM	MRL	108438411	3	29230238	G	A	1.81	0.4	7.76361e-06
GLM	MRL	108440021	3	29231848	G	A	2.04	0.39	3.63108e-07
GLM	MRL	108440324	3	29232151	C	A	1.94	0.39	1.29145e-06
GLM	MRL	108440861	3	29232688	C	T	1.89	0.39	1.96886e-06
GLM	MRL	108440881	3	29232708	G	A	2.03	0.39	2.90313e-07
GLM	MRL	108441019	3	29232846	C	T	1.96	0.4	1.19922e-06
GLM	MRL	108442555	3	29234382	C	T	1.82	0.4	7.64224e-06
GLM	MRL	108442595	3	29234422	G	A	1.94	0.39	1.29145e-06
GLM	MRL	108443676	3	29235503	G	A	2.02	0.39	3.47481e-07
GLM	MRL	108443677	3	29235504	C	A	2.02	0.39	3.47481e-07
GLM	MRL	108446416	3	29238243	C	A	1.95	0.39	1.16493e-06
GLM	MRL	108446827	3	29238654	T	C	1.95	0.39	9.98357e-07
GLM	MRL	108449431	3	29241258	C	A	1.96	0.4	1.25757e-06
GLM	MRL	108452331	3	29244158	C	T	2	0.4	7.70267e-07
GLM	MRL	108452462	3	29244289	C	A	1.98	0.4	1.11791e-06
GLM	MRL	108453971	3	29245798	C	T	2.04	0.4	4.41781e-07
GLM	MRL	108455085	3	29246912	G	A	1.81	0.4	6.69017e-06
GLM	MRL	108463406	3	29255233	T	C	2.08	0.42	8.5615e-07
GLM	MRL	108463430	3	29255257	C	A	2.14	0.42	4.88562e-07
GLM	MRL	108467188	3	29259015	G	T	2.04	0.39	3.3283e-07
GLM	MRL	108467375	3	29259202	G	A	2.03	0.39	2.84012e-07
GLM	MRL	108467698	3	29259525	G	A	1.95	0.39	1.09628e-06
GLM	MRL	108468848	3	29260675	C	T	1.91	0.4	1.86847e-06
GLM	MRL	108478811	3	29270638	A	G	1.92	0.39	1.03984e-06
GLM	MRL	108482982	3	29274809	A	G	2.02	0.39	3.47481e-07
GLM	MRL	108486048	3	29277875	G	T	2.03	0.39	2.92923e-07
GLM	MRL	108491138	3	29282965	G	A	2.01	0.4	8.3903e-07
GLM	MRL	108491153	3	29282980	C	T	2.05	0.4	4.15145e-07
GLM	MRL	108496362	3	29288189	C	G	1.78	0.39	8.67625e-06
GLM	MRL	108496456	3	29288283	C	T	1.75	0.39	9.0332e-06
GLM	MRL	108583171	3	29374998	G	A	1.75	0.39	9.80427e-06
GLM	MRL	108616751	3	29408578	G	A	1.99	0.39	4.49962e-07
GLM	MRL	108643161	3	29434988	G	T	1.8	0.39	5.19462e-06
GLM	MRL	143554994	4	27933002	G	A	1.35	0.3	8.68155e-06
GLM	MRL	143632266	4	28010274	A	G	1.21	0.27	9.41524e-06
GLM	MRL	143633662	4	28011670	C	A	1.3	0.26	9.50473e-07
GLM	MRL	143635072	4	28013080	T	C	1.21	0.26	3.0724e-06
GLM	MRL	143666666	4	28044674	C	T	-1.14	0.26	9.93189e-06
GLM	MRL	143670943	4	28048951	G	T	1.21	0.26	4.16166e-06
GLM	MRL	143671444	4	28049452	G	C	1.24	0.26	2.28863e-06
GLM	MRL	143671684	4	28049692	T	C	1.17	0.26	7.17234e-06
GLM	MRL	143673409	4	28051417	T	A	1.17	0.26	9.49531e-06
GLM	MRL	143674500	4	28052508	A	G	1.22	0.26	3.87043e-06
GLM	MRL	143674679	4	28052687	C	T	1.18	0.26	7.9713e-06
GLM	MRL	143678075	4	28056083	C	T	1.2	0.26	5.53346e-06
GLM	MRL	150600216	4	34978224	T	C	1.56	0.31	6.21389e-07
GLM	MRL	150600387	4	34978395	C	T	-1.35	0.29	6.10456e-06
GLM	MRL	150600727	4	34978735	C	T	-1.51	0.3	5.10878e-07
GLM	MRL	150603697	4	34981705	G	A	-1.33	0.29	5.47893e-06
GLM	MRL	150605502	4	34983510	C	T	-1.53	0.3	4.0501e-07
GLM	MRL	150605985	4	34983993	G	A	-1.59	0.29	1.06031e-07
GLM	MRL	150608295	4	34986303	A	G	-1.46	0.3	1.38789e-06
GLM	MRL	150608838	4	34986846	A	T	-1.36	0.3	7.43343e-06
GLM	MRL	150611690	4	34989698	G	A	-1.38	0.3	4.32319e-06
GLM	MRL	150659898	4	35037906	T	C	1.7	0.33	3.58127e-07
GLM	MRL	150660294	4	35038302	T	C	-1.41	0.3	3.43609e-06
GLM	MRL	150660403	4	35038411	A	C	1.64	0.33	9.10098e-07
GLM	MRL	155784361	5	4659675	T	C	1.54	0.28	1.12716e-07
GLM	MRL	155844274	5	4719588	C	T	1.43	0.3	2.09857e-06
GLM	MRL	156489942	5	5365256	G	A	1.19	0.25	4.26695e-06
GLM	MRL	156493797	5	5369111	T	A	1.13	0.24	4.82357e-06
GLM	MRL	156494241	5	5369555	T	A	1.12	0.25	7.16733e-06
GLM	MRL	156494488	5	5369802	G	A	1.14	0.25	8.27103e-06
GLM	MRL	181783658	6	700538	A	G	1.22	0.27	8.14674e-06
GLM	MRL	190686012	6	9602892	C	T	1.45	0.32	7.83271e-06
GLM	MRL	192133552	6	11050432	A	G	1.22	0.27	8.39292e-06
GLM	MRL	192166773	6	11083653	C	G	1.22	0.27	9.99054e-06
GLM	MRL	192210569	6	11127449	G	C	1.18	0.26	7.05598e-06
GLM	MRL	192210579	6	11127459	G	A	1.25	0.27	4.76509e-06
GLM	MRL	192212079	6	11128959	A	T	1.18	0.25	4.6305e-06
GLM	MRL	192214638	6	11131518	A	C	1.12	0.25	9.75482e-06
GLM	MRL	221477023	7	9145116	T	C	1.52	0.29	3.65403e-07
GLM	MRL	221477055	7	9145148	T	C	1.41	0.31	9.74106e-06
GLM	MRL	221477068	7	9145161	C	T	1.43	0.31	7.13663e-06
GLM	MRL	221477077	7	9145170	C	A	1.45	0.32	6.10912e-06
GLM	MRL	221488470	7	9156563	G	A	1.52	0.32	3.69006e-06
GLM	MRL	221510249	7	9178342	A	G	1.44	0.31	5.91127e-06
GLM	MRL	221510362	7	9178455	C	T	1.43	0.32	8.16125e-06
GLM	MRL	221512082	7	9180175	G	A	1.49	0.32	3.49156e-06
GLM	MRL	221618753	7	9286846	C	T	1.4	0.28	9.9517e-07
GLM	MRL	263089176	8	21059648	G	C	2.24	0.5	9.96675e-06
GLM	MRL	269834344	8	27804816	T	A	1.08	0.24	9.084e-06
GLM	MRL	269835051	8	27805523	C	T	1.07	0.24	9.92774e-06
GLM	MRL	269836644	8	27807116	C	G	1.12	0.24	5.41083e-06
GLM	MRL	269838074	8	27808546	G	A	1.1	0.24	6.89317e-06
GLM	MRL	269839987	8	27810459	C	T	1.15	0.24	2.62192e-06
GLM	MRL	269840027	8	27810499	C	G	1.12	0.24	3.76664e-06
GLM	MRL	269853838	8	27824310	G	A	-1.03	0.22	4.20774e-06
GLM	MRL	269860334	8	27830806	G	A	-1.01	0.22	4.79161e-06
GLM	MRL	269862950	8	27833422	C	T	-1	0.22	7.31846e-06
GLM	MRL	269863083	8	27833555	G	A	1.31	0.25	1.57887e-07
GLM	MRL	269863694	8	27834166	G	A	1.19	0.24	1.30074e-06
GLM	MRL	269864561	8	27835033	C	G	1.11	0.24	4.90989e-06
GLM	MRL	269864978	8	27835450	G	A	1.23	0.25	1.57717e-06
GLM	MRL	269866134	8	27836606	A	G	1.23	0.24	6.89669e-07
GLM	MRL	269866137	8	27836609	C	T	1.29	0.24	1.89619e-07
GLM	MRL	269896724	8	27867196	G	A	-1.01	0.22	7.43606e-06
GLM	MRL	293259867	9	22787317	T	C	-1.19	0.25	2.05082e-06
GLM	MRL	310003292	10	16518022	G	A	1.28	0.28	5.41415e-06
GLM	MRL	310014757	10	16529487	A	G	1.33	0.29	7.56754e-06
GLM	MRL	310015067	10	16529797	A	G	1.5	0.3	1.14347e-06
GLM	MRL	310017517	10	16532247	T	C	1.35	0.29	3.49121e-06
GLM	MRL	310017755	10	16532485	G	A	1.3	0.29	6.82305e-06
GLM	MRL	310018224	10	16532954	T	C	1.47	0.29	8.20109e-07
GLM	MRL	310018356	10	16533086	A	G	1.49	0.29	5.60677e-07
GLM	MRL	310018895	10	16533625	A	G	1.35	0.29	6.23555e-06
GLM	MRL	310022582	10	16537312	G	A	1.38	0.3	4.00283e-06
GLM	MRL	310023664	10	16538394	A	T	1.35	0.29	6.39068e-06
GLM	MRL	310023977	10	16538707	T	A	1.32	0.29	6.25187e-06
GLM	MRL	310051379	10	16566109	A	G	1.33	0.29	9.22949e-06
GLM	MRL	310051958	10	16566688	G	T	1.33	0.28	3.89692e-06
GLM	MRL	310052845	10	16567575	G	A	1.39	0.3	6.03981e-06
GLM	MRL	310053111	10	16567841	T	G	1.32	0.28	4.13644e-06
GLM	MRL	310060448	10	16575178	C	T	1.5	0.28	1.4588e-07
GLM	MRL	310060459	10	16575189	A	G	1.49	0.28	2.06143e-07
GLM	MRL	310060470	10	16575200	A	T	1.36	0.28	1.88015e-06
GLM	MRL	310060472	10	16575202	C	T	1.42	0.28	7.03271e-07
GLM	MRL	310060737	10	16575467	T	A	1.34	0.28	1.86662e-06
GLM	MRL	310060738	10	16575468	C	A	1.36	0.28	1.3437e-06
GLM	MRL	310060745	10	16575475	A	C	1.47	0.28	2.15727e-07
GLM	MRL	310060749	10	16575479	T	C	1.45	0.28	2.68972e-07
GLM	MRL	310060754	10	16575484	C	T	1.35	0.28	2.28806e-06
GLM	MRL	310061286	10	16576016	T	C	1.39	0.29	2.43219e-06
GLM	MRL	310064161	10	16578891	T	A	1.46	0.3	1.18069e-06
GLM	MRL	310064824	10	16579554	A	G	1.34	0.29	3.62148e-06
GLM	MRL	310064847	10	16579577	T	C	1.31	0.29	7.47916e-06
GLM	MRL	310065772	10	16580502	G	A	1.29	0.28	6.93781e-06
GLM	MRL	310065777	10	16580507	C	T	1.33	0.28	3.551e-06
GLM	MRL	310102869	10	16617599	C	G	1.17	0.26	8.97783e-06
GLM	MRL	311745703	10	18260433	T	G	-1.17	0.25	3.22006e-06
GLM	MRL	323214691	11	6522134	C	T	1.56	0.33	4.21195e-06
GLM	MRL	336495807	11	19803250	C	T	1.13	0.25	6.13268e-06
GLM	MRL	336553778	11	19861221	C	T	1.13	0.25	5.86755e-06
GLM	MRL	340344726	11	23652169	C	T	-1.14	0.25	5.30881e-06
GLM	MRL	368308123	12	22594460	A	T	1.28	0.27	2.01069e-06
GLM	ARL	30054035	1	30054035	C	T	0.85	0.18	3.5e-06
GLM	ARL	30167236	1	30167236	C	T	0.86	0.18	2.95e-06
GLM	ARL	30297146	1	30297146	T	C	0.88	0.19	7.09e-06
GLM	ARL	30376069	1	30376069	A	C	0.92	0.19	9.61e-07
GLM	ARL	30377435	1	30377435	C	T	0.89	0.19	6.88e-06
GLM	ARL	30377471	1	30377471	T	A	0.95	0.18	1.13e-07
GLM	ARL	30377553	1	30377553	A	G	0.87	0.19	9.1e-06
GLM	ARL	30377769	1	30377769	T	C	0.9	0.19	3.13e-06
GLM	ARL	30379791	1	30379791	T	C	1.06	0.2	2.13e-07
GLM	ARL	30383390	1	30383390	G	A	0.85	0.18	3.81e-06
GLM	ARL	30384232	1	30384232	C	T	1.05	0.2	2.02e-07
GLM	ARL	30385605	1	30385605	G	T	0.92	0.18	5.16e-07
GLM	ARL	30386167	1	30386167	A	G	0.99	0.2	1.15e-06
GLM	ARL	30386986	1	30386986	A	C	0.86	0.19	6.22e-06
GLM	ARL	30396096	1	30396096	C	T	0.86	0.19	7.67e-06
GLM	ARL	30397731	1	30397731	C	T	0.92	0.2	5.19e-06
GLM	ARL	30405136	1	30405136	T	G	0.86	0.19	5.71e-06
GLM	ARL	30405464	1	30405464	A	G	1.06	0.2	2.89e-07
GLM	ARL	30406451	1	30406451	C	G	0.95	0.2	2.32e-06
GLM	ARL	30411956	1	30411956	T	C	0.89	0.19	4.42e-06
GLM	ARL	30507526	1	30507526	T	C	0.71	0.15	6.18e-06
GLM	ARL	30516128	1	30516128	A	G	1.01	0.2	6.91e-07
GLM	ARL	30517849	1	30517849	T	C	1.04	0.2	4.56e-07
GLM	ARL	30571617	1	30571617	T	C	0.89	0.2	9.37e-06
GLM	ARL	31258476	1	31258476	T	C	0.81	0.18	9.9e-06
GLM	ARL	92388939	3	13180766	A	T	-0.52	0.11	1.09e-06
GLM	ARL	92388996	3	13180823	A	T	-0.52	0.11	1.63e-06
GLM	ARL	139379141	4	23757149	G	T	-0.8	0.17	6.51e-06
GLM	ARL	139396742	4	23774750	G	A	-0.79	0.17	8.04e-06
GLM	ARL	139485505	4	23863513	G	C	0.52	0.11	7.12e-06
GLM	ARL	139498609	4	23876617	T	G	-0.81	0.18	5.89e-06
GLM	ARL	139536616	4	23914624	A	G	-0.81	0.18	6.66e-06
GLM	ARL	146781398	4	31159406	G	A	0.53	0.12	5.91e-06
GLM	ARL	150600216	4	34978224	T	C	0.72	0.15	1.94e-06
GLM	ARL	150600727	4	34978735	C	T	-0.66	0.14	6.94e-06
GLM	ARL	150601149	4	34979157	G	A	0.7	0.15	9.29e-06
GLM	ARL	150659898	4	35037906	T	C	0.77	0.16	2.22e-06
GLM	ARL	150660403	4	35038411	A	C	0.74	0.16	4.59e-06
GLM	ARL	181508646	6	425526	G	A	0.51	0.11	4.78e-06
GLM	ARL	181783658	6	700538	A	G	0.61	0.13	3.92e-06
GLM	ARL	181795121	6	712001	C	T	0.49	0.11	6.98e-06
GLM	ARL	182014681	6	931561	G	A	0.57	0.13	8.37e-06
GLM	ARL	213116686	7	784779	G	A	0.95	0.2	2.41e-06
GLM	ARL	221604902	7	9272995	C	T	0.62	0.13	6.21e-06
GLM	ARL	221618753	7	9286846	C	T	0.65	0.14	2.83e-06
GLM	ARL	236712046	7	24380139	G	A	-0.5	0.11	9.01e-06
GLM	ARL	237677039	7	25345132	A	G	0.57	0.12	2.91e-06
GLM	ARL	263803677	8	21774149	T	C	1.03	0.23	7.47e-06
GLM	ARL	277724957	9	7252407	C	T	0.76	0.16	4.49e-06
GLM	ARL	277732666	9	7260116	A	G	0.72	0.15	3.96e-06
GLM	ARL	310060448	10	16575178	C	T	0.63	0.14	5.23e-06
GLM	ARL	310060459	10	16575189	A	G	0.62	0.14	9.25e-06
GLM	ARL	310060745	10	16575475	A	C	0.62	0.14	6.03e-06
GLM	ARL	325738460	11	9045903	C	T	0.52	0.11	3.71e-06
GLM	ARL	325738821	11	9046264	G	T	0.52	0.11	3.52e-06
GLM	ARL	325740694	11	9048137	G	A	0.51	0.11	5.76e-06
GLM	ARL	325744836	11	9052279	G	A	0.53	0.11	2.2e-06
GLM	ARL	325744838	11	9052281	G	A	0.53	0.11	2.91e-06
GLM	ARL	325745868	11	9053311	C	T	0.51	0.11	4.92e-06
GLM	ARL	325750698	11	9058141	C	A	0.5	0.11	9.68e-06
GLM	ARL	325752811	11	9060254	A	G	0.53	0.11	1.52e-06
GLM	ARL	325759610	11	9067053	A	G	0.49	0.11	9.28e-06
GLM	TRN	18498114	1	18498114	A	T	0.32	0.07	7.77e-06
GLM	TRN	47560456	2	4289533	G	C	-0.33	0.07	3.93e-06
GLM	TRN	67749264	2	24478341	T	C	0.2	0.04	2.05e-06
GLM	TRN	68007606	2	24736683	C	T	-0.18	0.04	9.32e-06
GLM	TRN	208555863	6	27472743	G	T	-0.37	0.08	4.89e-06
GLM	TRN	274796539	9	4323989	G	A	-0.36	0.08	7.48e-06
GLM	TRN	274815528	9	4342978	C	A	-0.37	0.08	2.78e-06
GLM	TRN	277486506	9	7013956	T	C	-0.38	0.08	8.78e-06
GLM	TRN	279496499	9	9023949	G	A	-0.44	0.09	5.53e-06
GLM	TRN	279499374	9	9026824	C	G	-0.41	0.09	2.89e-06
GLM	TRN	279577651	9	9105101	T	C	-0.3	0.06	1.9e-06
GLM	TRN	279583582	9	9111032	C	T	-0.36	0.08	2.87e-06
GLM	TRN	279602825	9	9130275	G	A	-0.31	0.07	9.62e-06
GLM	TRN	279693141	9	9220591	A	G	-0.35	0.08	5.54e-06
GLM	TRN	279699072	9	9226522	A	G	-0.34	0.07	9.09e-06
GLM	TRN	325796155	11	9103598	C	T	0.27	0.06	1.69e-06
GLM	TRN	325913309	11	9220752	G	A	-0.25	0.05	1.01e-06
GLM	TRN	325983492	11	9290935	T	C	-0.24	0.05	2.5e-06
GLM	TRN	325983946	11	9291389	G	A	-0.24	0.05	3.89e-06
GLM	TRN	325984537	11	9291980	T	A	-0.23	0.05	4.32e-06
GLM	TRN	325984578	11	9292021	C	T	-0.25	0.05	9.32e-07
GLM	TRN	325984782	11	9292225	G	A	-0.23	0.05	8.61e-06
GLM	TRN	325984896	11	9292339	C	T	-0.24	0.05	2.66e-06
GLM	TRN	325984925	11	9292368	A	G	-0.26	0.05	1.73e-07
GLM	TRN	325985271	11	9292714	T	C	-0.23	0.05	7.14e-06
GLM	TRN	325985697	11	9293140	A	G	-0.23	0.05	5.98e-06
GLM	TRN	325986607	11	9294050	T	C	-0.23	0.05	8.93e-06
GLM	TRN	325988119	11	9295562	A	G	-0.25	0.05	1.47e-06
GLM	TRN	325988426	11	9295869	G	A	-0.23	0.05	8.9e-06
GLM	TRN	325996658	11	9304101	C	T	-0.23	0.05	8.86e-06
GLM	TRN	325999663	11	9307106	T	C	-0.23	0.05	7.19e-06
GLM	TRN	326001825	11	9309268	C	T	-0.23	0.05	8.75e-06
MLM	MRL	30047081	1	30047081	C	T	1.91	0.42	7.74478e-06
MLM	MRL	30052538	1	30052538	A	G	1.84	0.4	6.26335e-06
MLM	MRL	30162608	1	30162608	T	G	1.82	0.41	9.31853e-06
MLM	MRL	30167236	1	30167236	C	T	1.89	0.41	4.57175e-06
MLM	MRL	30185176	1	30185176	A	C	2.01	0.44	7.38935e-06
MLM	MRL	30319874	1	30319874	T	C	2.11	0.44	2.61835e-06
MLM	MRL	30376069	1	30376069	A	C	2.2	0.42	2.77544e-07
MLM	MRL	30377471	1	30377471	T	A	2.04	0.39	3.69231e-07
MLM	MRL	30377769	1	30377769	T	C	2.14	0.43	1.08384e-06
MLM	MRL	30379578	1	30379578	A	C	2.08	0.45	4.70765e-06
MLM	MRL	30379791	1	30379791	T	C	2.43	0.46	2.60571e-07
MLM	MRL	30383390	1	30383390	G	A	1.84	0.41	9.06548e-06
MLM	MRL	30384232	1	30384232	C	T	2.5	0.46	9.0911e-08
MLM	MRL	30386167	1	30386167	A	G	2.11	0.46	5.37238e-06
MLM	MRL	30397731	1	30397731	C	T	2.01	0.45	9.61706e-06
MLM	MRL	30405464	1	30405464	A	G	2.48	0.47	2.188e-07
MLM	MRL	30411842	1	30411842	A	C	1.98	0.42	3.92442e-06
MLM	MRL	30411956	1	30411956	T	C	1.98	0.43	5.19379e-06
MLM	MRL	30507526	1	30507526	T	C	1.62	0.34	2.3072e-06
MLM	MRL	30516128	1	30516128	A	G	2.3	0.46	8.14294e-07
MLM	MRL	30517849	1	30517849	T	C	2.45	0.48	5.78849e-07
MLM	MRL	30618785	1	30618785	G	C	2.21	0.46	2.52971e-06
MLM	MRL	30655024	1	30655024	G	A	2	0.42	3.6694e-06
MLM	MRL	30736645	1	30736645	A	G	2.36	0.52	9.23807e-06
MLM	MRL	30812840	1	30812840	A	T	1.71	0.37	6.7008e-06
MLM	MRL	30814498	1	30814498	A	G	1.96	0.41	1.94719e-06
MLM	MRL	30964552	1	30964552	C	A	2.05	0.41	1.02009e-06
MLM	MRL	30966277	1	30966277	T	G	1.91	0.38	6.59503e-07
MLM	MRL	30970174	1	30970174	C	T	1.84	0.4	7.35266e-06
MLM	MRL	31165770	1	31165770	T	C	1.9	0.42	6.26932e-06
MLM	MRL	31258476	1	31258476	T	C	2.04	0.42	1.47614e-06
MLM	MRL	31491670	1	31491670	C	T	1.73	0.38	7.40694e-06
MLM	MRL	70523757	2	27252834	G	A	1.27	0.27	2.88173e-06
MLM	MRL	92388939	3	13180766	A	T	-1.28	0.25	4.8171e-07
MLM	MRL	92388996	3	13180823	A	T	-1.25	0.25	7.83442e-07
MLM	MRL	92391628	3	13183455	C	T	-1.23	0.25	1.64623e-06
MLM	MRL	92393246	3	13185073	T	C	-1.25	0.26	1.95638e-06
MLM	MRL	92404747	3	13196574	G	T	1.06	0.23	4.5968e-06
MLM	MRL	92494293	3	13286120	G	A	-1.12	0.25	6.86235e-06
MLM	MRL	92520781	3	13312608	C	A	1.12	0.25	7.75912e-06
MLM	MRL	92522346	3	13314173	C	T	1.11	0.25	9.21226e-06
MLM	MRL	92522356	3	13314183	A	G	1.12	0.25	8.08438e-06
MLM	MRL	92523030	3	13314857	G	A	1.15	0.25	5.73856e-06
MLM	MRL	92523133	3	13314960	C	T	1.12	0.25	8.7746e-06
MLM	MRL	92523176	3	13315003	G	A	1.13	0.25	7.59956e-06
MLM	MRL	92523189	3	13315016	T	A	1.13	0.25	6.79783e-06
MLM	MRL	92523241	3	13315068	T	C	1.12	0.25	9.19649e-06
MLM	MRL	105807177	3	26599004	T	G	-1.18	0.26	9.75394e-06
MLM	MRL	105831603	3	26623430	A	C	-1.19	0.25	3.70193e-06
MLM	MRL	107310474	3	28102301	C	T	1.58	0.35	7.01974e-06
MLM	MRL	107422847	3	28214674	C	T	1.82	0.38	2.84229e-06
MLM	MRL	108048565	3	28840392	T	A	2.13	0.47	9.58102e-06
MLM	MRL	108115944	3	28907771	A	T	2.13	0.45	3.88794e-06
MLM	MRL	108115949	3	28907776	G	T	2.13	0.45	3.88794e-06
MLM	MRL	108115958	3	28907785	A	C	2.14	0.47	8.67213e-06
MLM	MRL	108374902	3	29166729	G	A	2.12	0.46	5.57393e-06
MLM	MRL	150605985	4	34983993	G	A	-1.51	0.33	5.16592e-06
MLM	MRL	150659898	4	35037906	T	C	1.6	0.35	7.75181e-06
MLM	MRL	221477023	7	9145116	T	C	1.74	0.37	3.05516e-06
MLM	MRL	269866137	8	27836609	C	T	1.29	0.28	7.38621e-06
MLM	ARL	30377471	1	30377471	T	A	0.93	0.19	1.48e-06
MLM	ARL	30379791	1	30379791	T	C	1.08	0.22	1.94e-06
MLM	ARL	30384232	1	30384232	C	T	1.08	0.22	1.52e-06
MLM	ARL	30385605	1	30385605	G	T	0.89	0.19	6.21e-06
MLM	ARL	30386167	1	30386167	A	G	1	0.22	7.01e-06
MLM	ARL	30405464	1	30405464	A	G	1.08	0.23	2.46e-06
MLM	ARL	30516128	1	30516128	A	G	1.01	0.22	5.64e-06
MLM	ARL	30517849	1	30517849	T	C	1.08	0.23	3.64e-06
MLM	ARL	277724957	9	7252407	C	T	0.83	0.17	1.77e-06
MLM	ARL	277732666	9	7260116	A	G	0.74	0.16	5.54e-06
MLM	TRN	274815528	9	4342978	C	A	-0.38	0.08	8.02161e-06
MLM	TRN	279693141	9	9220591	A	G	-0.37	0.08	7.45204e-06
MLM	TRN	325984925	11	9292368	A	G	-0.27	0.06	2.32736e-06

## Sheet: Tables S5
Table S5. The significant SNP loci in xian and geng rice populations
Subpopulation	Trait	SNP	CHROM	POS	REF	ALT	Effect	SE	P_value	QTL
Xian	MRL	30052538	1	30052538	A	G	2.557	0.533151	3.10034e-06
Xian	MRL	30074979	1	30074979	A	G	2.70414	0.591004	8.20087e-06
Xian	MRL	30144916	1	30144916	G	A	2.78207	0.606548	7.81083e-06
Xian	MRL	30167236	1	30167236	C	T	2.62711	0.573756	8.08486e-06
Xian	MRL	30376069	1	30376069	A	C	2.59019	0.554238	5.34643e-06
Xian	MRL	30379791	1	30379791	T	C	2.71831	0.588872	6.87284e-06
Xian	MRL	30384232	1	30384232	C	T	2.74872	0.56947	2.69949e-06	qMRL1.1
Xian	MRL	30405464	1	30405464	A	G	2.78207	0.606548	7.81083e-06
Xian	MRL	30514412	1	30514412	G	A	2.71235	0.596111	9.15431e-06
Xian	MRL	30573037	1	30573037	A	G	2.76989	0.592748	5.35734e-06
Xian	MRL	30618785	1	30618785	G	C	2.96046	0.602876	1.84618e-06
Xian	MRL	30618932	1	30618932	C	T	2.83334	0.624594	9.71521e-06
Xian	MRL	30694645	1	30694645	C	T	2.87055	0.625799	7.80093e-06
Xian	MRL	30809261	1	30809261	A	G	2.7639	0.579715	3.51968e-06
Xian	MRL	30809619	1	30809619	G	C	2.7808	0.584905	3.73676e-06
Xian	MRL	30813003	1	30813003	T	C	2.82014	0.616352	8.19986e-06
Xian	MRL	30813442	1	30813442	C	A	2.72941	0.596723	8.25415e-06
Xian	MRL	30813901	1	30813901	A	G	2.87866	0.623349	6.81537e-06
Xian	MRL	30813927	1	30813927	A	G	2.87866	0.623349	6.81537e-06
Xian	MRL	30813960	1	30813960	G	C	2.9605	0.632301	5.14561e-06
Xian	MRL	30814498	1	30814498	A	G	2.731	0.600212	9.15494e-06
Xian	MRL	30817605	1	30817605	T	C	2.9605	0.632301	5.14561e-06
Xian	MRL	30817619	1	30817619	A	G	2.9605	0.632301	5.14561e-06
Xian	MRL	30865887	1	30865887	G	A	2.89298	0.623259	6.14547e-06
Xian	MRL	30905507	1	30905507	G	A	3.01079	0.611718	1.75339e-06
Xian	MRL	30957839	1	30957839	G	A	2.81418	0.578986	2.31782e-06
Xian	MRL	30958127	1	30958127	T	C	2.63548	0.566382	5.84385e-06
Xian	MRL	30958711	1	30958711	T	C	2.74189	0.575947	3.63164e-06
Xian	MRL	30958798	1	30958798	T	C	2.69941	0.554967	2.28069e-06
Xian	MRL	30959285	1	30959285	A	G	2.72275	0.591778	7.34218e-06
Xian	MRL	30962672	1	30962672	A	G	2.59566	0.566491	7.97307e-06
Xian	MRL	30962796	1	30962796	T	G	2.70904	0.573082	4.21601e-06
Xian	MRL	30964552	1	30964552	C	A	2.96634	0.580181	7.23623e-07
Xian	MRL	30966277	1	30966277	T	G	2.6657	0.557525	3.31157e-06
Xian	MRL	30970174	1	30970174	C	T	2.75114	0.556547	1.58981e-06
Xian	MRL	30970483	1	30970483	T	C	2.93142	0.602171	2.23975e-06
Xian	MRL	31039651	1	31039651	C	T	3.12867	0.621819	1.05795e-06
Xian	MRL	31160224	1	31160224	A	G	2.75309	0.60595	9.42032e-06
Xian	MRL	31165770	1	31165770	T	C	2.7871	0.605706	7.32798e-06
Xian	MRL	31166077	1	31166077	T	C	3.12067	0.644271	2.5009e-06
Xian	MRL	31172400	1	31172400	T	G	3.00886	0.612275	1.81559e-06
Xian	MRL	31246683	1	31246683	A	G	2.64094	0.577266	8.22177e-06	qMRL1.2
Xian	MRL	31260230	1	31260230	T	G	2.90486	0.56671	6.80562e-07
Xian	MRL	31326136	1	31326136	C	T	2.97675	0.607654	1.94831e-06
Xian	MRL	31332666	1	31332666	A	G	2.6856	0.583823	7.37224e-06
Xian	MRL	31854821	1	31854821	G	A	2.74292	0.594895	7.03547e-06
Xian	MRL	92389213	3	13181040	C	A	1.30853	0.262759	1.34291e-06	qMRL3.1
Xian	MRL	92520840	3	13312667	T	C	1.23321	0.268667	7.69754e-06
Xian	MRL	105807486	3	26599313	C	A	1.48351	0.323116	7.65861e-06	qMRL3.2
Xian	MRL	105807978	3	26599805	G	A	1.50516	0.326396	7.01383e-06
Xian	MRL	107509077	3	28300904	A	G	1.83916	0.396349	6.18491e-06	qMRL3.3
Xian	ARL	69623326	2	26352403	T	C	0.580005	0.127358	8.99543e-06
Xian	ARL	150660403	4	35038411	A	C	0.879469	0.191791	7.85093e-06
Xian	ARL	368443901	12	22730238	G	A	1.53972	0.335202	7.58753e-06
Xian	TRN	276913147	9	6440597	G	A	-0.279983	0.0603075	6.12181e-06
Xian	TRN	276913152	9	6440602	A	G	-0.282692	0.0605567	5.47034e-06
Xian	TRN	276913153	9	6440603	T	C	-0.282692	0.0605567	5.47034e-06
Xian	TRN	276913156	9	6440606	T	C	-0.282692	0.0605567	5.47034e-06
Xian	TRN	276913160	9	6440610	C	T	-0.282692	0.0605567	5.47034e-06
Xian	TRN	276913163	9	6440613	T	C	-0.305672	0.0616842	1.50319e-06
Xian	TRN	276913202	9	6440652	G	A	-0.274293	0.0596243	7.36147e-06
Xian	TRN	325984578	11	9292021	C	T	-0.364599	0.07592	3.01253e-06	qTRN11.1
Xian	TRN	325984925	11	9292368	A	G	-0.346532	0.0719797	2.85573e-06
Xian	TRN	325988119	11	9295562	A	G	-0.362738	0.0796667	9.03204e-06
Xian	TRN	325989518	11	9296961	C	G	-0.368358	0.0812975	9.93947e-06
Geng	MRL	298233848	10	4748578	C	T	1.75276	0.3811	9.39785e-06

## Sheet: Table S6
Table S6. All candidate gene annotations for non-synonymous mutations in exons of 10 QTLs
QTLs	Genes	Gene annotation
qMRL1.1	LOC_Os01g52250	starch synthase, putative, expressed
	LOC_Os01g53090	pathogen-related protein, putative, expressed
qMRL1.2	LOC_Os01g53980	IQ calmodulin-binding motif family protein, expressed
	LOC_Os01g54400	VQ domain containing protein, putative, expressed
	LOC_Os01g54940	dehydrogenase, putative, expressed
qMRL3.2	LOC_Os03g22830	zinc finger, C3HC4 type domain containing protein, expressed
qMRL3.3	LOC_Os03g49050	possible lysine decarboxylase domain containing protein, expressed
	LOC_Os03g49170	zinc finger family protein, putative, expressed
	LOC_Os03g49180	alkaline phytoceramidase, putative, expressed
	LOC_Os03g49210	BRCA1 C Terminus domain containing protein, expressed
	LOC_Os03g49220	adenylosuccinate synthetase, chloroplast precursor, putative, expressed
	LOC_Os03g49260	lipoxygenase, putative, expressed
	LOC_Os03g49350	lipozygenase protein, putative, expressed
	LOC_Os03g49380	lipoxygenase, putative, expressed
	LOC_Os03g49464	tetratricopeptide-like helical, putative, expressed
	LOC_Os03g49570	domain of unknown function, DUF250 domain containing protein, expressed
	LOC_Os03g49610	Os3bglu8 - beta-glucosidase, exo-beta-glucansase, high similarity to Os3bglu7, expressed
	LOC_Os03g49710	ribosomal protein S13p/S18e, putative, expressed
	LOC_Os03g50010	toc64, putative, expressed
	LOC_Os03g50040	phytanoyl-CoA dioxygenase, putative, expressed
	LOC_Os03g50050	OsFBDUF16 - F-box and DUF domain containing protein, expressed
qMRL7.1	LOC_Os07g15320	leaf senescence related protein, putative, expressed
	LOC_Os07g15440	alanyl-tRNA synthetase family protein, expressed
	LOC_Os07g15540	ethylene receptor, putative, expressed
	LOC_Os07g15570	pentatricopeptide, putative, expressed
	LOC_Os07g15600	H-BTB6 - Bric-a-Brac, Tramtrack, Broad Complex BTB domain with H family conserved sequence, expressed
	LOC_Os07g15640	CRR4, putative, expressed
	LOC_Os07g15930	legume lectins beta domain containing protein, expressed
	LOC_Os07g15940	legume lectins beta domain containing protein, expressed
	LOC_Os07g16140	FAD binding protein, putative, expressed
	LOC_Os07g16224	piwi domain containing protein, putative, expressed
qARL1.1	LOC_Os01g52250	starch synthase, putative, expressed
	LOC_Os01g53090	pathogen-related protein, putative, expressed
qARL9.1	LOC_Os09g12240	serine/threonine-protein kinase BRI1-like 1 precursor, putative, expressed
	LOC_Os09g12290	bifunctional aspartokinase/homoserine dehydrogenase, chloroplast precursor, putative, expressed
	LOC_Os09g12500	EMB1381, putative, expressed
	LOC_Os09g12710	WD domain, G-beta repeat domain containing protein, expressed
	LOC_Os09g12730	RNA recognition motif containing protein, expressed
	LOC_Os09g12770	Myb-like DNA-binding domain containing protein, putative, expressed
	LOC_Os09g12970	plant protein of unknown function domain containing protein, expressed
	LOC_Os09g13040	plant protein of unknown function domain containing protein, expressed
qTRN9.1	LOC_Os09g07900	ubiquitin-protein ligase 1, putative, expressed
	LOC_Os09g08030	nodulin MtN3 family protein, putative, expressed
	LOC_Os09g08072	glycosyl hydrolases, putative, expressed
	LOC_Os09g08120	beta-fructofuranosidase, insoluble isoenzyme 7 precursor, putative, expressed
	LOC_Os09g08160	plant protein of unknown function domain containing protein, expressed
	LOC_Os09g08190	sulfotransferase domain containing protein, expressed
	LOC_Os09g08390	CRAL/TRIO domain containing protein, expressed
	LOC_Os09g08720	cinnamoyl CoA reductase, putative, expressed
qTRN9.2	LOC_Os09g15400	inositol monophosphatase family protein, putative, expressed
qTRN11.1	LOC_Os11g16260	laccase precursor protein, putative, expressed
	LOC_Os11g16280	F-box domain containing protein, expressed
	LOC_Os11g16290	NIN, putative, expressed
	LOC_Os11g16370	uridine/cytidine kinase-like 1, putative, expressed
	LOC_Os11g16410	oxidoreductase, short chain dehydrogenase/reductase family, putative, expressed
	LOC_Os11g16420	protein of unknown function containing protein, expressed
	LOC_Os11g16430	diphthamide biosynthesis protein, putative, expressed
	LOC_Os11g16470	MLA10, putative, expressed
	LOC_Os11g16530	mal, putative, expressed
	LOC_Os11g16540	tetratricopeptide repeat domain containing protein, expressed
	LOC_Os11g16550	uncharacterized protein ycf53, putative, expressed
	LOC_Os11g16590	ATP-dependent Clp protease ATP-binding subunit clpA homolog CD4B,chloroplast precursor, putative, expressed
	LOC_Os11g16680	transferase family protein, putative, expressed
	LOC_Os11g16770	ATP-dependent Clp protease ATP-binding subunit clpA homolog CD4B,chloroplast precursor, putative, expressed
	LOC_Os11g16970	carnitine racemase like protein, putative, expressed
	LOC_Os11g17014	NB-ARC domain containing protein, expressed
	LOC_Os11g17080	OsMPK15 - Putative MAPK based on amino acid sequence homology, expressed
